# Supplementary material for: Signal transduction controls heterogeneous NF-κB dynamics and target gene expression through cytokine-specific refractory states
Source: PubMed Central journal article supplement (PMC4935804; doi:10.1038/ncomms12057), 2016-07-06
Supplement: ncomms12057-s1.pdf [file ncomms12057-s1.pdf]

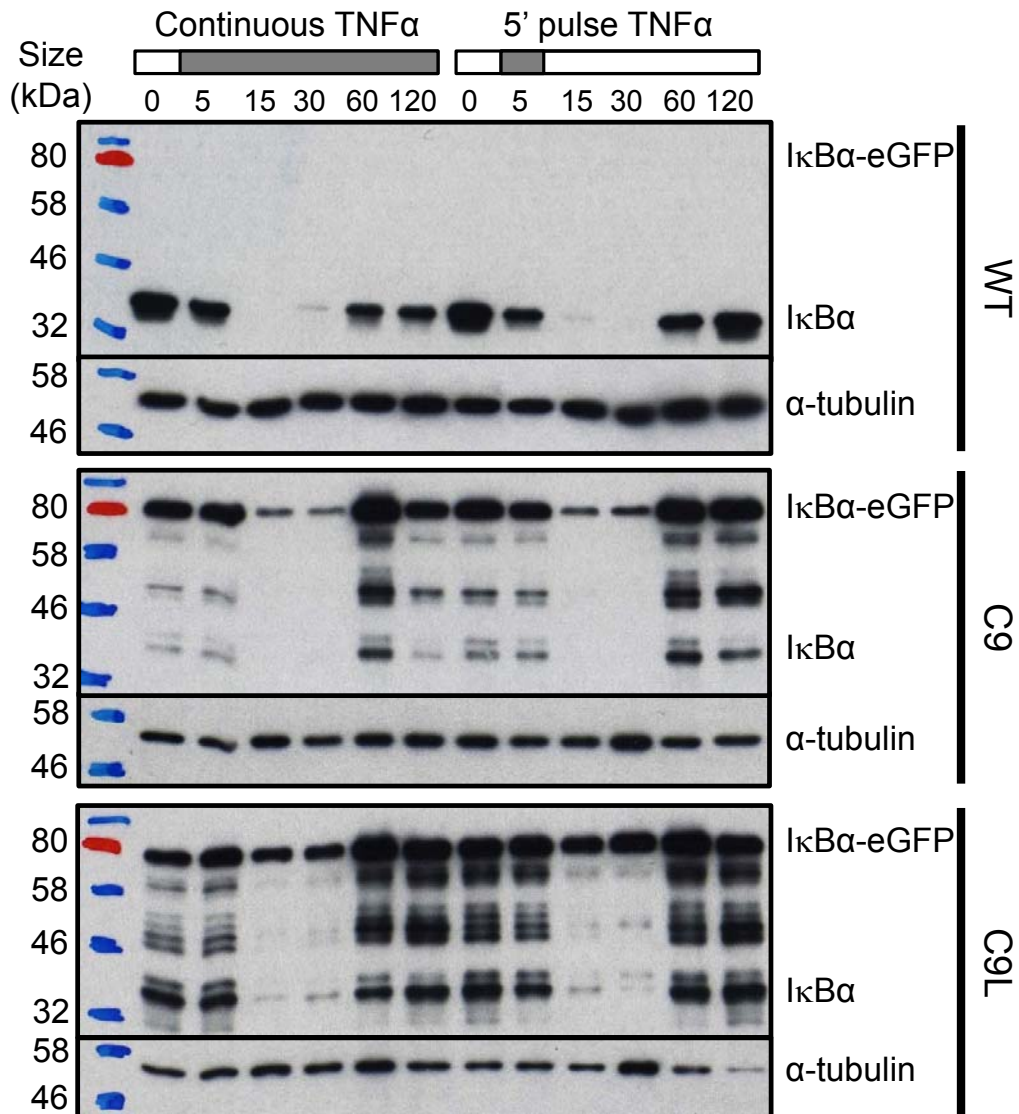

**Supplementary Figure 1. Immunoblotting analysis of IκBα protein level in WT, C9 and C9L SK-N-AS cells.** Cells stimulated with a continuous or a 5 min pulse of 10 ng ml<sup>-1</sup> of TNFα. Whole cell lysates harvested at indicated times after simulation (in min). Shown are the levels of the endogenous and exogenous (IκBα-eGFP), as well as α-tubulin loading control.

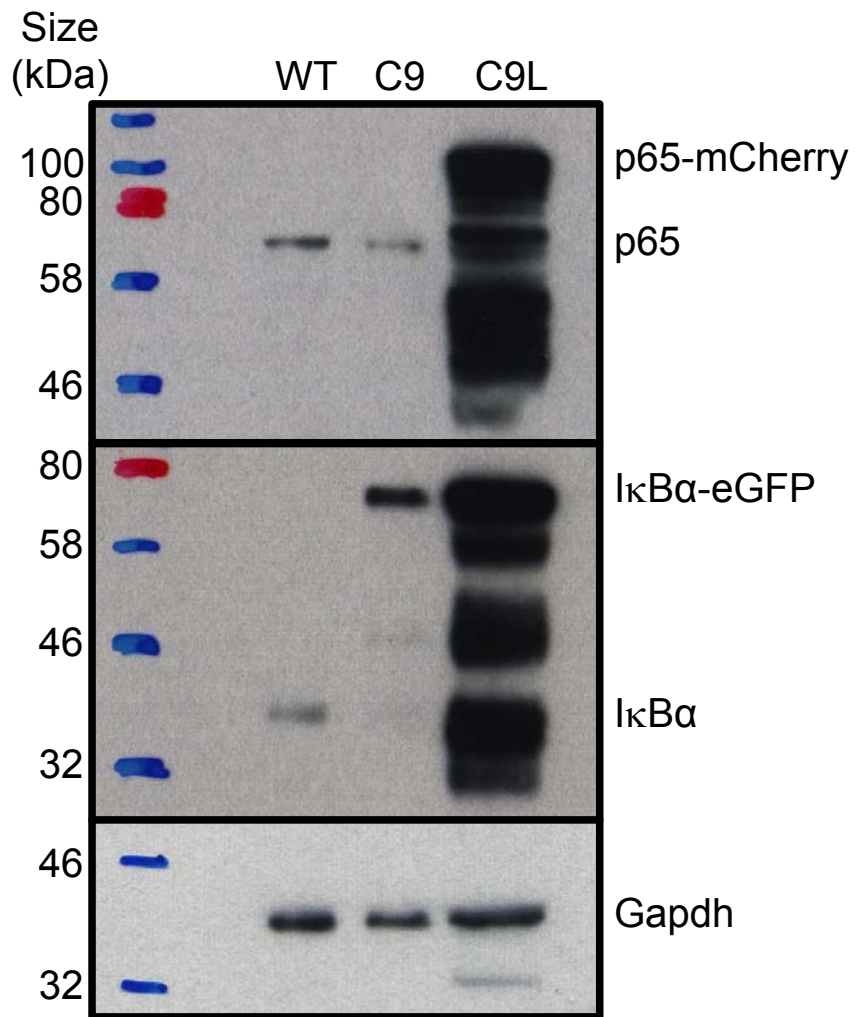

**Supplementary Figure 2. Immunoblotting analysis of IκBα and NF-κB p65 levels in WT, C9 and C9L SK-N-AS cells. Shown are unstimulated cells (with Gapdh loading control).**

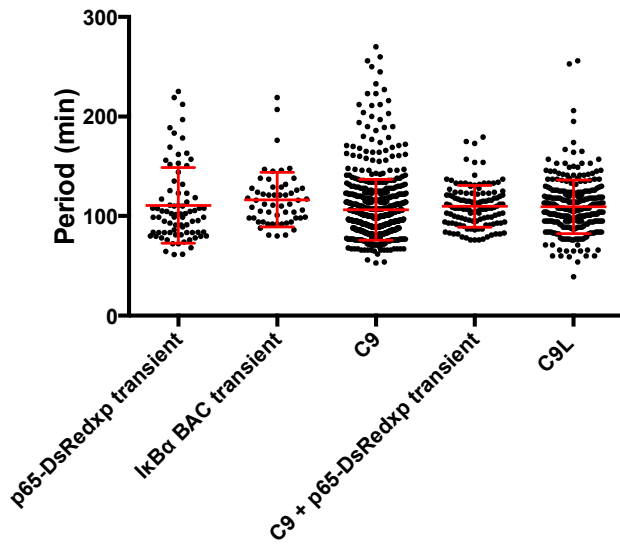

**Supplementary Figure 3. Timing of NF- $\kappa$ B oscillations in different model systems.** Shown are individual peak-to-peak timings for C9 (163 cells) and C9L cells (30 cells), respectively, with corresponding mean ( $\pm$  s.d.) per condition (data from Fig. 1F). Also shown are SK-N-AS cells transiently transfected with p65-DsRedxp plasmid (34 cells, taken from <sup>1</sup>) or I $\kappa$ B $\alpha$ -eGFP BAC (15 cells), or C9 cells transfected with p65-DsRedxp plasmid (34 cells). Peak-to-peak defined as the time between consecutive troughs of the total I $\kappa$ B $\alpha$ -eGFP signal. Cells stimulated with 10 ng ml<sup>-1</sup> of TNF $\alpha$ .

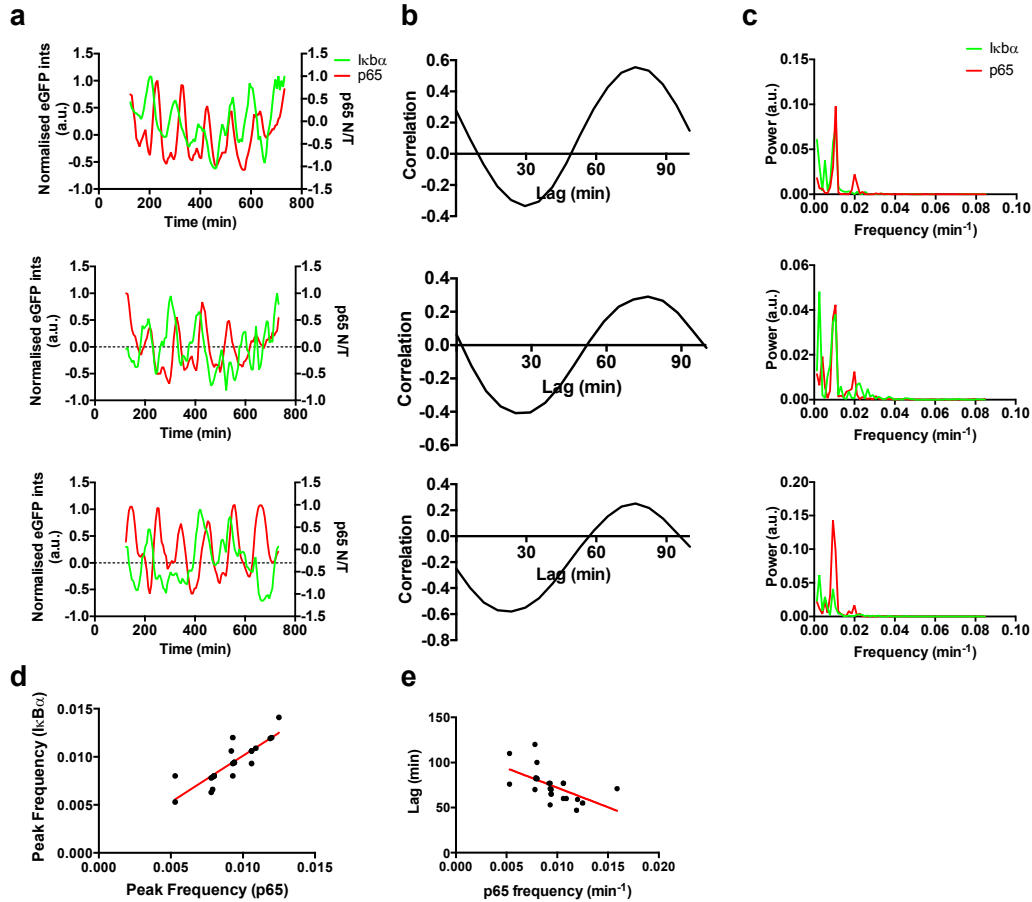

**Supplementary Figure 4. Analysis of  $I\kappa B\alpha$  and p65 oscillation in C9L cells stimulated with continuous  $\text{TNF}\alpha$ .** Shown are (a) representative  $I\kappa B\alpha$ -eGFP and p65-mCherry single cell traces, (b) the cross-correlation function between the corresponding  $I\kappa B\alpha$ -eGFP and p65-mCherry single cell traces, (c) the power spectra calculated for  $I\kappa B\alpha$ -eGFP (in green) and p65-mCherry (in red) traces, (d) the correlation between peak  $I\kappa B\alpha$ -eGFP and p65-mCherry oscillation frequency (in red a fitted linear regression line) (e) the correlation between lag times and p65-mCherry oscillation frequency. 17 C9L cells were analysed (in d and e) and single cell traces were normalized to levels at 0 min, trajectories beyond 120 min were analysed.

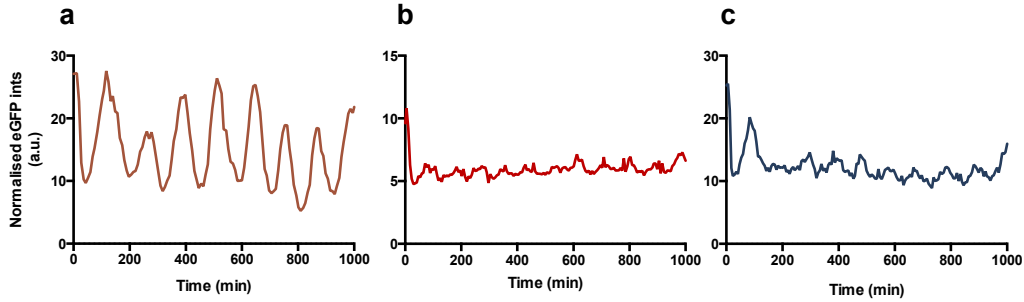

**Supplementary Figure 5. Individual cells have unique oscillation frequency.** Representative  $\text{I}\kappa\text{B}\alpha$ -eGFP single C9 cell traces stimulated with continuous  $\text{TNF}\alpha$  used to calculate power spectra in Fig. 1g (using the same colour scheme).

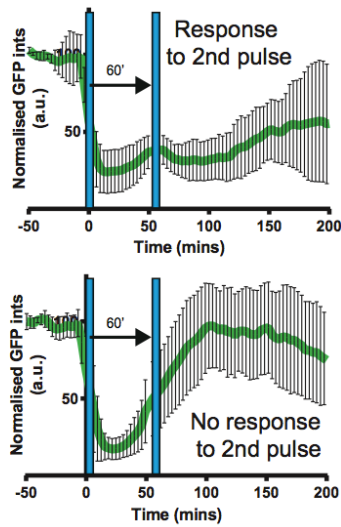

**Supplementary Figure 6. Response to two 5 min  $\text{TNF}\alpha$  pulses applied at 0 and 60 min.** Shown are the mean ( $\pm$  s.d.) of the normalized single-cell total  $\text{I}\kappa\text{B}\alpha$ -GFP fluorescent intensity in C9 cells from Fig. 2b. Cells were clustered in responding and non-responding classes based on the  $\text{I}\kappa\text{B}\alpha$ -gradient at the time of the 2<sup>nd</sup> pulse. Timing of  $\text{TNF}\alpha$  stimulation represented with a blue bar.

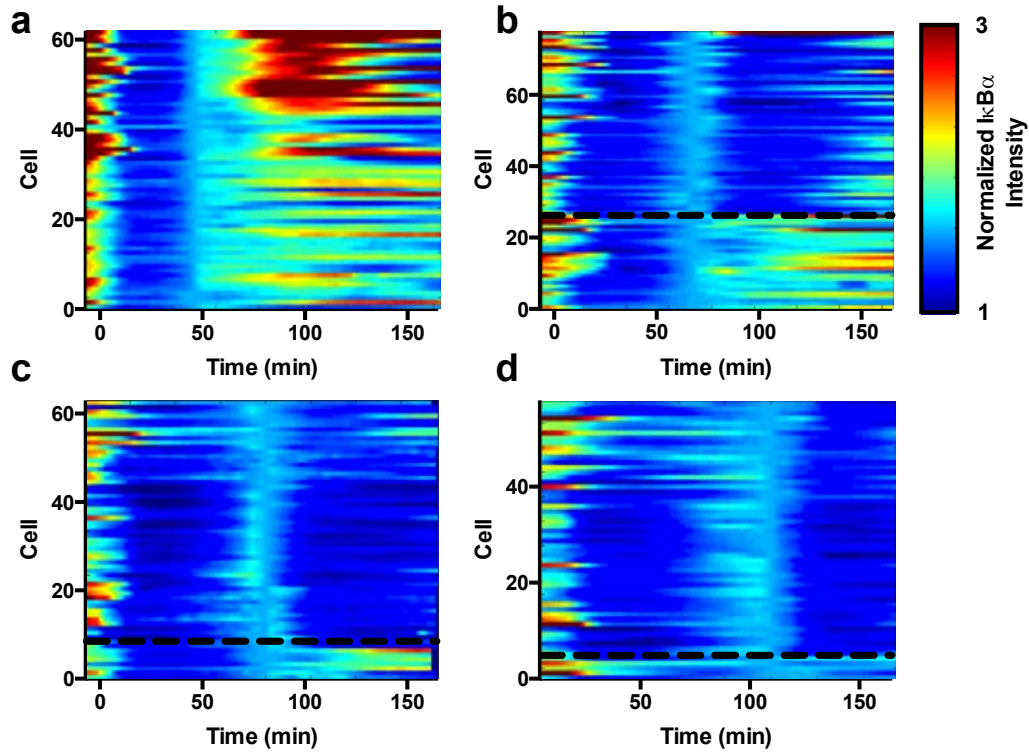

**Supplementary Figure 7. Response to  $TNF\alpha$  pulses.** Single-cell responses to 5 min  $TNF\alpha$  pulses at (a) 50, (b) 70, (c) 80 and (d) 100 min interval. Shown is the heat map of individual cell traces (Y axis), clustered by the normalized total  $\kappa B\alpha$ -eGFP single-cell trajectories, per condition. Data from Fig. 2f normalized to the  $\kappa B\alpha$ -eGFP level at the time of 2<sup>nd</sup> pulse, time depicted in minutes. Broken-lines indicate “*responding*” (above) and “*non-responding*” (below) cell groups.

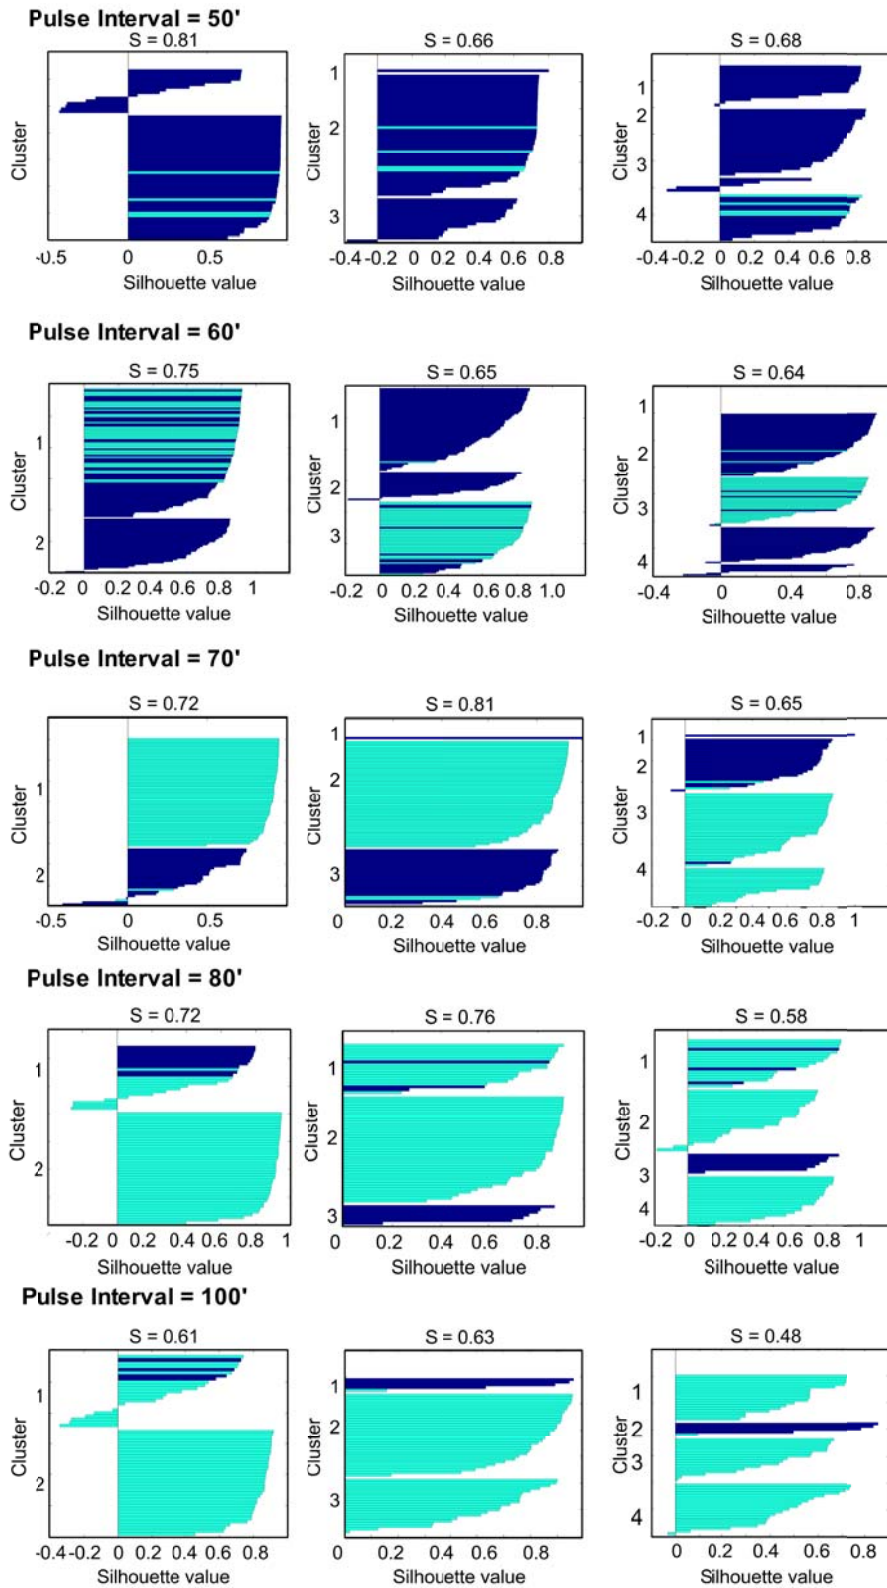

**Supplementary Figure 8. Clustering analysis of single cell responses to TNF $\alpha$  pulses.** Shown is Silhouette plot and coefficients (S) for each data set (from Fig. 2f) as a function of number of clusters (2, 3 and 4, respectively, from



left to right). Cells classified as “*responders*” base on the  $\text{I}\kappa\text{B}\alpha$ -eGFP gradient at the time of the 2<sup>nd</sup> peak depicted with green colour.

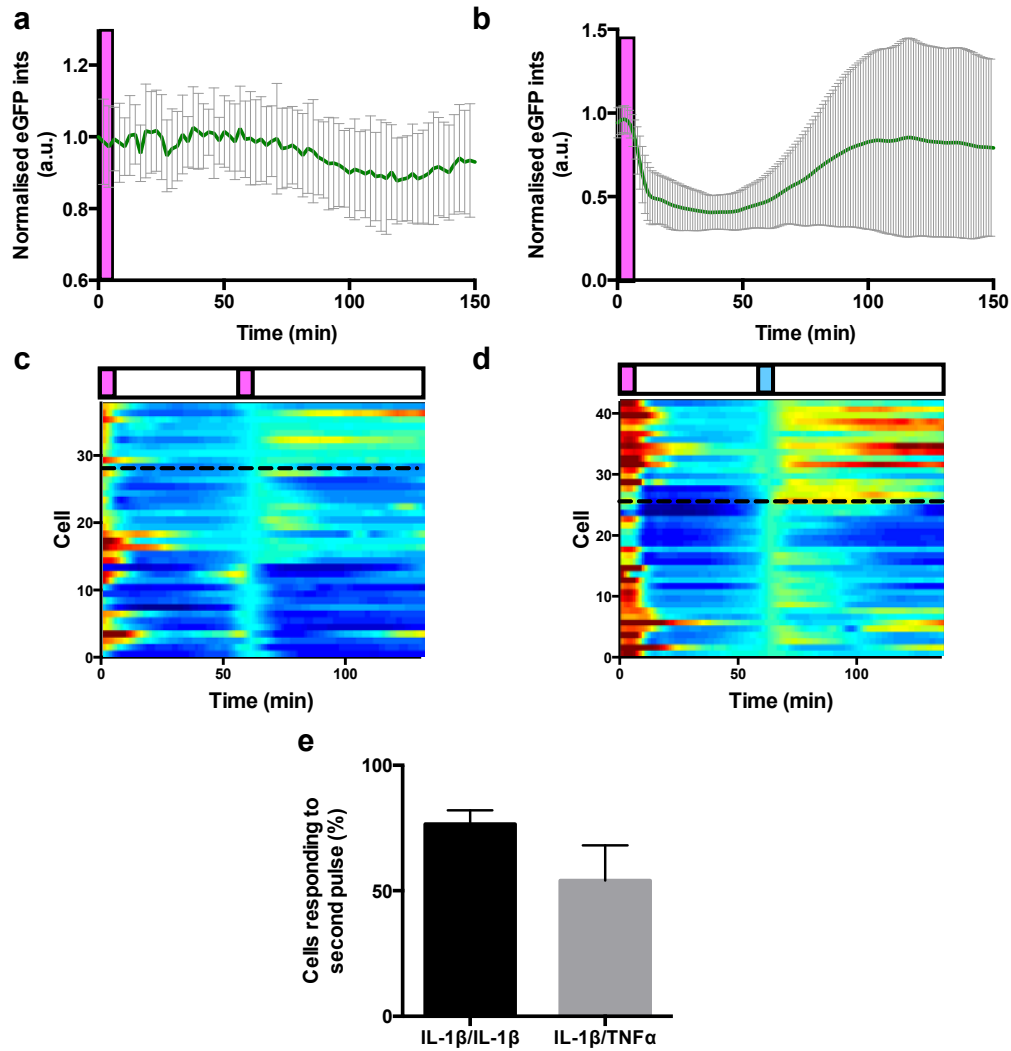

**Supplementary Figure 9. IL-1 $\beta$  stimulation induced a refractory state.** (a) C9 cells stimulated with IL-1 $\beta$  (depicted with a pink bar) and IL-1 $\beta$  neutralising antibody. Shown is mean and s.d. of 35 single cell traces. (b) C9 cells stimulated with a single 5 min IL-1 $\beta$  pulse (wash performed with media containing IL-1 $\beta$  neutralising antibody at 5 min after stimulation). Shown is mean and s.d. of 37 single cell traces. (c) Responses to two 5 min IL-1 $\beta$  pulses at 60 min interval (washes performed with media containing IL-1 $\beta$  neutralising antibody). Shown is the heat map of individual cell traces (Y axis), clustered by the normalized total  $\text{I}\kappa\text{B}\alpha$ -eGFP single-cell trajectories (from 39 single cells). Data normalized to the  $\text{I}\kappa\text{B}\alpha$ -eGFP level at the time of 2<sup>nd</sup> pulse, time depicted in minutes. Broken-lines indicate “*responding*” (above) and “*non-responding*” (below) cell groups. (d) Responses to a 5 min IL-1 $\beta$  pulse followed by a 5 min TNF $\alpha$  pulse at 60 min (first wash performed with media containing IL-1 $\beta$  neutralising antibody). Shown is data from 42 single C9 cells, IL-1 $\beta$  and TNF $\alpha$  pulses depicted with pink and blue bars respectively. (e) Fraction of responding cells from data in c and d (shown is mean and data range of two replicates).



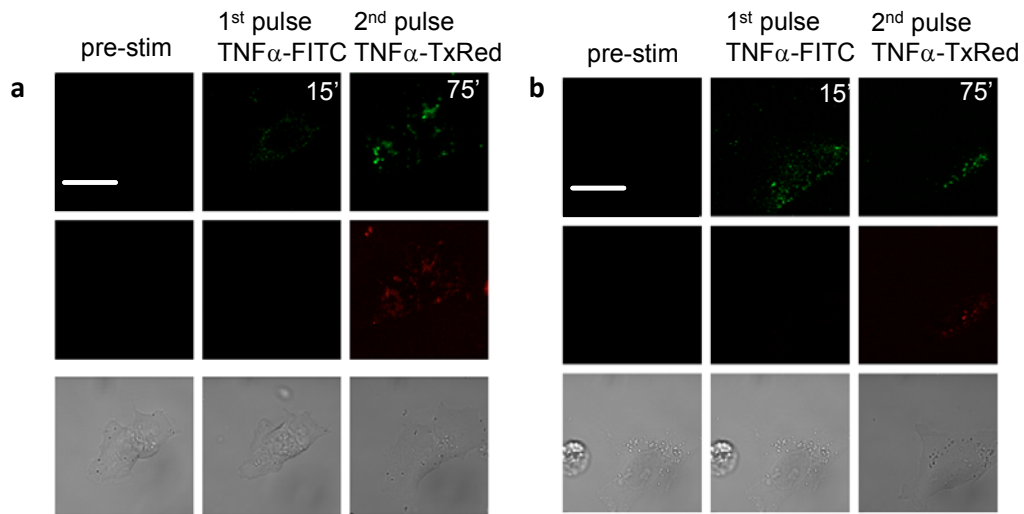

**Supplementary Figure 10. Analysis of TNF $\alpha$  internalisation.** Confocal microscopy images of WT cells stimulated with two pulses of fluorescently labelled TNF $\alpha$  at 60 min interval. (Two different fields on the imaging dish shown in a and b). FITC-conjugated TNF $\alpha$  (top panel, in green) was applied at 0 min for 5 min, washed with media, and fluorescence intensity measured at 15 min after the start of the experiment. Tx-Red-conjugated TNF $\alpha$  (middle panel, in red) was applied on the same cells at 60 min, washed with media, and then fluorescence intensity measured at 75 min after the start of the experiment. Corresponding bright field images are shown at the bottom. Scale bar 20  $\mu$ m.

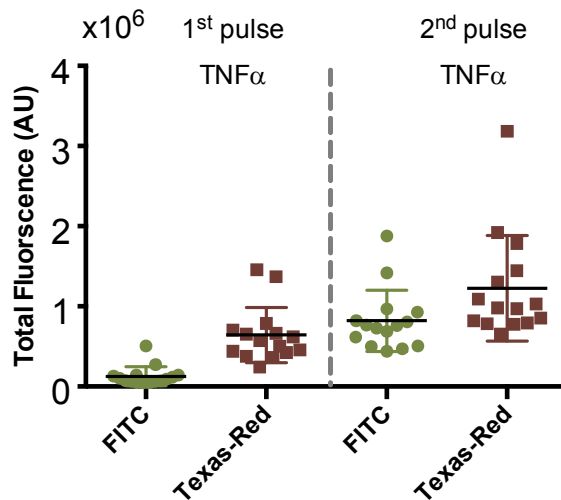

**Supplementary Figure 11. Quantification of TNF $\alpha$  internalization levels.** WT cells were stimulated with two pulses of fluorescently labelled TNF $\alpha$  at 60 min interval. Tx-Red-conjugated TNF $\alpha$  was applied at 0 min. FITC-conjugated TNF $\alpha$  was applied on the same cells at 60 min after the start of the experiment. Shown are the total fluorescence levels in 15 cells measured at 15' and 75' min after the start of the experiment.

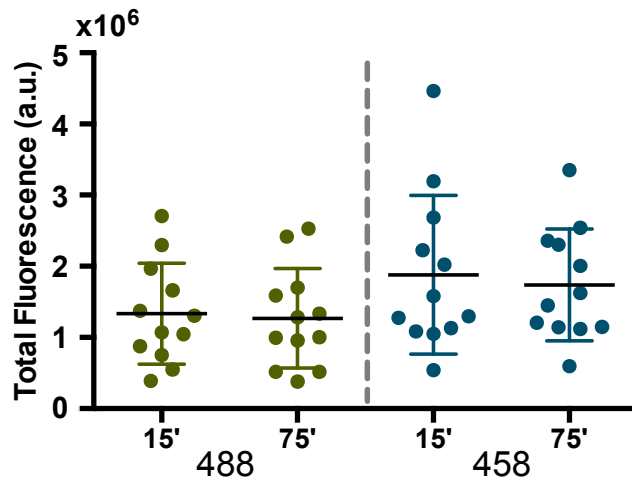

**Supplementary Figure 12. Analysis of TNF $\alpha$ -FITC internalization.** WT cells were stimulated with a 5-min pulse of FITC labelled TNF $\alpha$ . Shown are the total fluorescence levels in 12 cells measured at 15 and 75 min after the start of the experiment excited either with a 488 and 458 nm laser line.

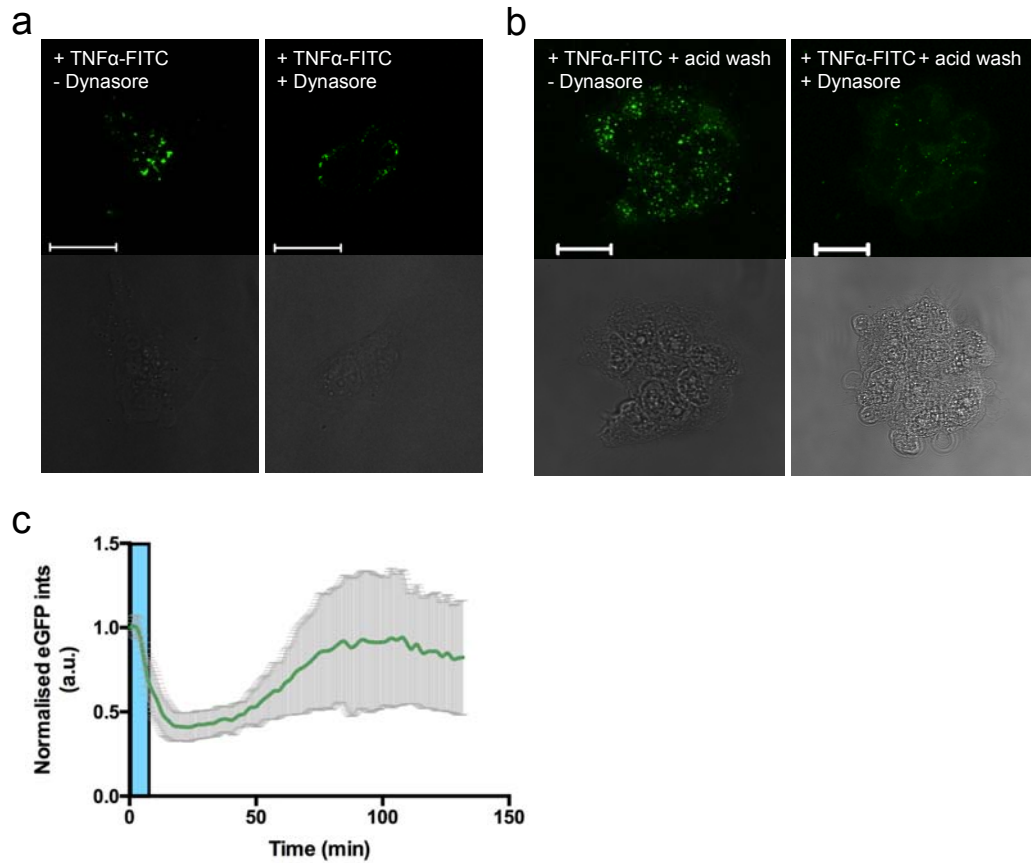

**Supplementary Figure 13. NF- $\kappa$ B signalling is not affected by endocytosis.** (a) Confocal microscopy images of WT SK-N-AS cells stimulated with a 5-min FITC-labelled TNF $\alpha$  pulse (measured at 40 min) with (left panel) or without (right panel) treatment with endocytosis inhibitor dynasore. Scale bar represents 20  $\mu$ m. (b) Maximal intensity projections of confocal microscopy images for WT SK-N-AS cells stimulated as in a, then treated with acid wash buffer and fixed prior to imaging. Scale bar represents 20  $\mu$ m. (c) Response to a 5 min TNF $\alpha$  pulse following a 1 h treatment with dynasore (as in a). Shown are mean and standard deviation of 25 single C9 cell traces.

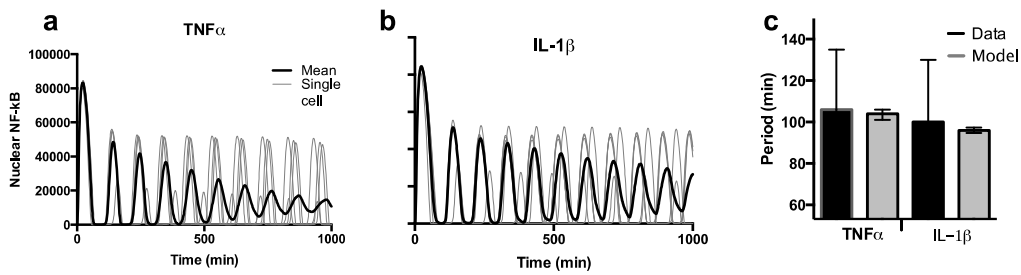

**Supplementary Figure 14. Simulated single cell NF- $\kappa$ B dynamics in response to continuous treatments.** Shown are responses to 10 ng ml $^{-1}$  (a) TNF $\alpha$  and (b) IL-1 $\beta$  stimulation. Shown are representative single cell responses (in grey) and the corresponding population average, 300 cells (in black) of nuclear NF- $\kappa$ B in a model with distributed IKKK level. (c) NF- $\kappa$ B oscillation period (mean  $\pm$  s.d.) in the model and the data (from Fig. 1f).

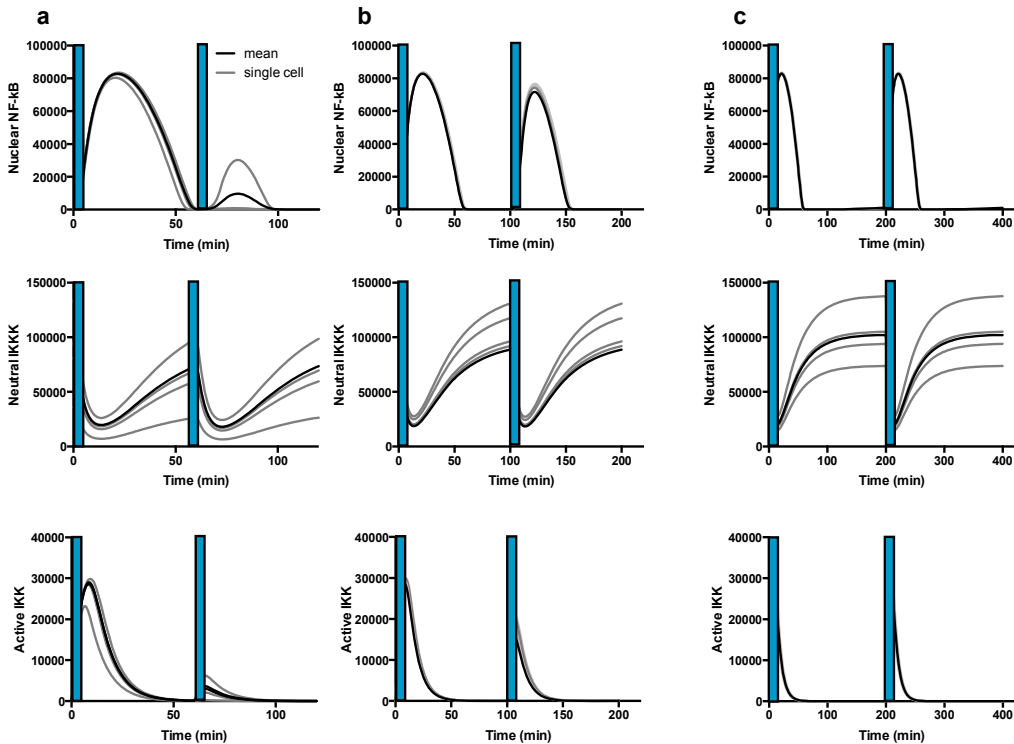

**Supplementary Figure 15. Model simulation of the IKK signalling module in response to two TNF $\alpha$  pulses at different time intervals.** Shown are simulations of response to TNF $\alpha$  pulses at (a) 60, (b) 100 and (c) 200 min intervals. Shown are representative single cell responses (in grey) and population average (from 300 cells, in black) of nuclear NF- $\kappa$ B (*NFkBn*), neutral IKKK (*IKKKn*) and active IKK (*IKKa*) in number of molecules.

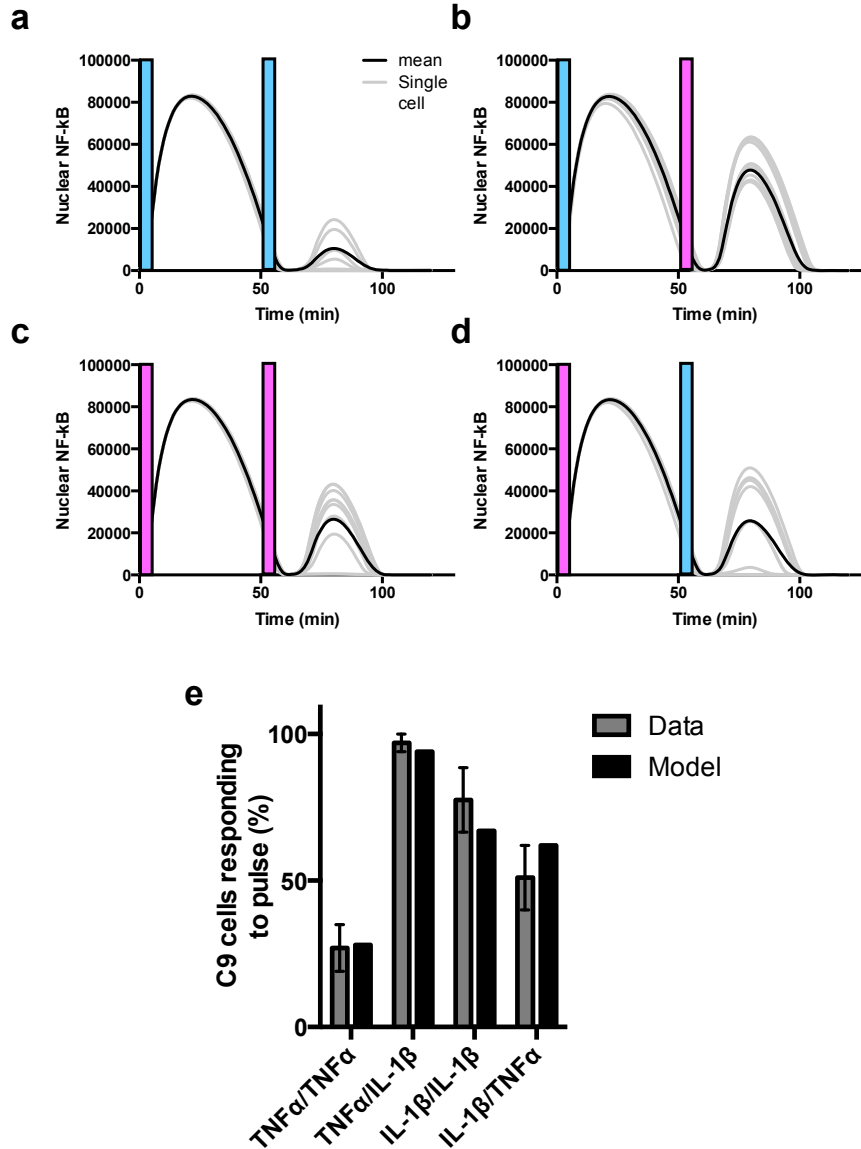

**Supplementary Figure 16. Model simulation of the response to alternate TNF $\alpha$  and IL-1 $\beta$  pulses at a 60 min interval.** Shown are simulated representative single cell trajectories of the nuclear NF- $\kappa$ B (in number of molecules) and the population average (300 cells, in black). TNF $\alpha$  and IL-1 $\beta$  pulses depicted with blue and pink bars, respectively. Shown in (a) TNF $\alpha$ /TNF $\alpha$ , (b) TNF $\alpha$ /IL-1 $\beta$ , (c) IL-1 $\beta$ /IL-1 $\beta$ , (d) IL-1 $\beta$ /TNF $\alpha$ . (e) Fraction of cells responding to 2<sup>nd</sup> pulse from A-D and corresponding data (Fig. 2b and Supplementary Figure 9). Shown is the mean and s.d. (TT, TI) of three replicates or data range (IT, II) of two replicates.

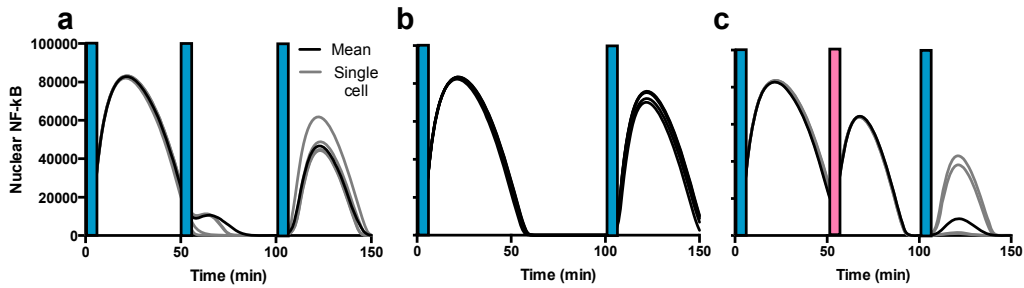

**Supplementary Figure 17. Simulated nuclear NF- $\kappa$ B following TNF $\alpha$  (blue) and IL-1 $\beta$  (pink) pulses at 50 min interval.** Shown are representative cells (grey) and mean (300 cells, in black) simulated with distributed IKKK parameter values under (a) TTT, (b) T\_T and (c) TIT conditions as in Fig. 6.

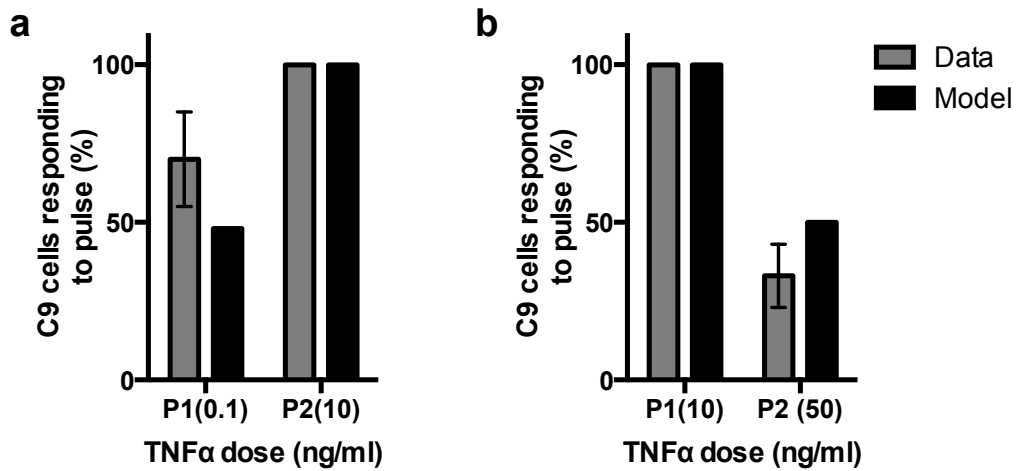

**Supplementary Figure 18. Dose-dependent activation of the refractory state.** Shown is a fraction of C9 cells responding to two TNF $\alpha$  pulses at a 60 min interval. (a) First pulse (P1, applied at 0 min): 0.1 ng ml<sup>-1</sup>, second pulse (P2, applied at 60 min): 10 ng ml<sup>-1</sup> (b) P1: 10 ng ml<sup>-1</sup>, P2: 50 ng ml<sup>-1</sup> pulse. Shown is the analysis of (a) 78 C9 cells (in grey, based on two replicates) and 300 simulated cells (in black, using the stochastic receptor module in the model), and (b) 30 C9 cells (grey bars, based on two replicates) and 300 simulated cells (in black, using deterministic receptor module).

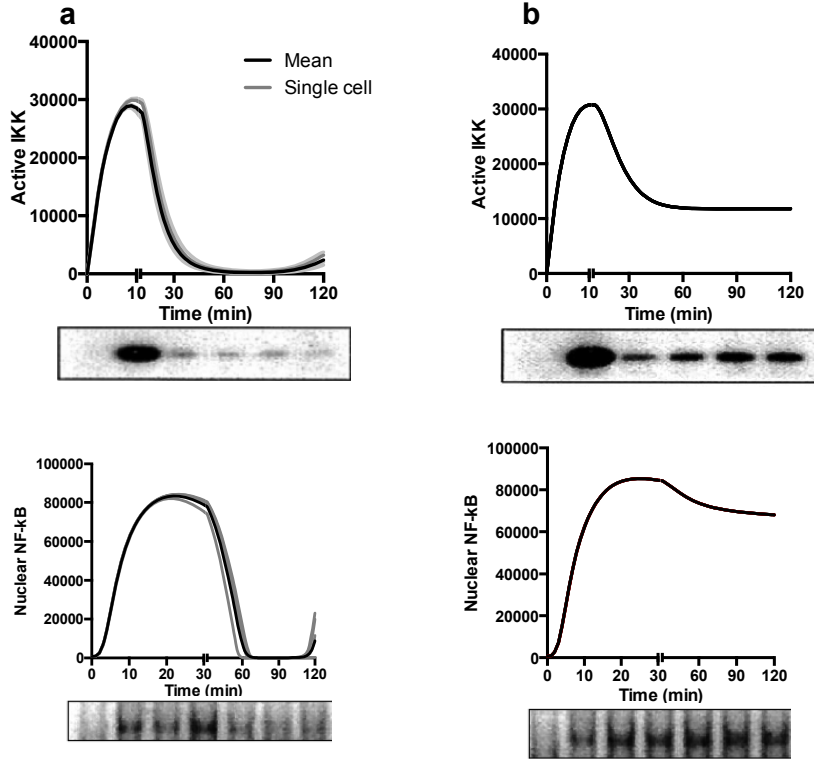

**Supplementary Figure 19. A20 feedback regulation following continuous  $10 \text{ ng ml}^{-1}$   $\text{TNF}\alpha$  stimulation.** Shown are representative cells (in grey) and population average (black) simulated with nominal parameter values. Number of nuclear NF- $\kappa$ B and active IKK molecules shown in (a) WT and (b) A20 KO cells. The model recapitulated MEFs data from <sup>2</sup> as depicted with the blots for the IKK activity assay (top) and electrophoretic mobility shift assay for the NF- $\kappa$ B activity (bottom).



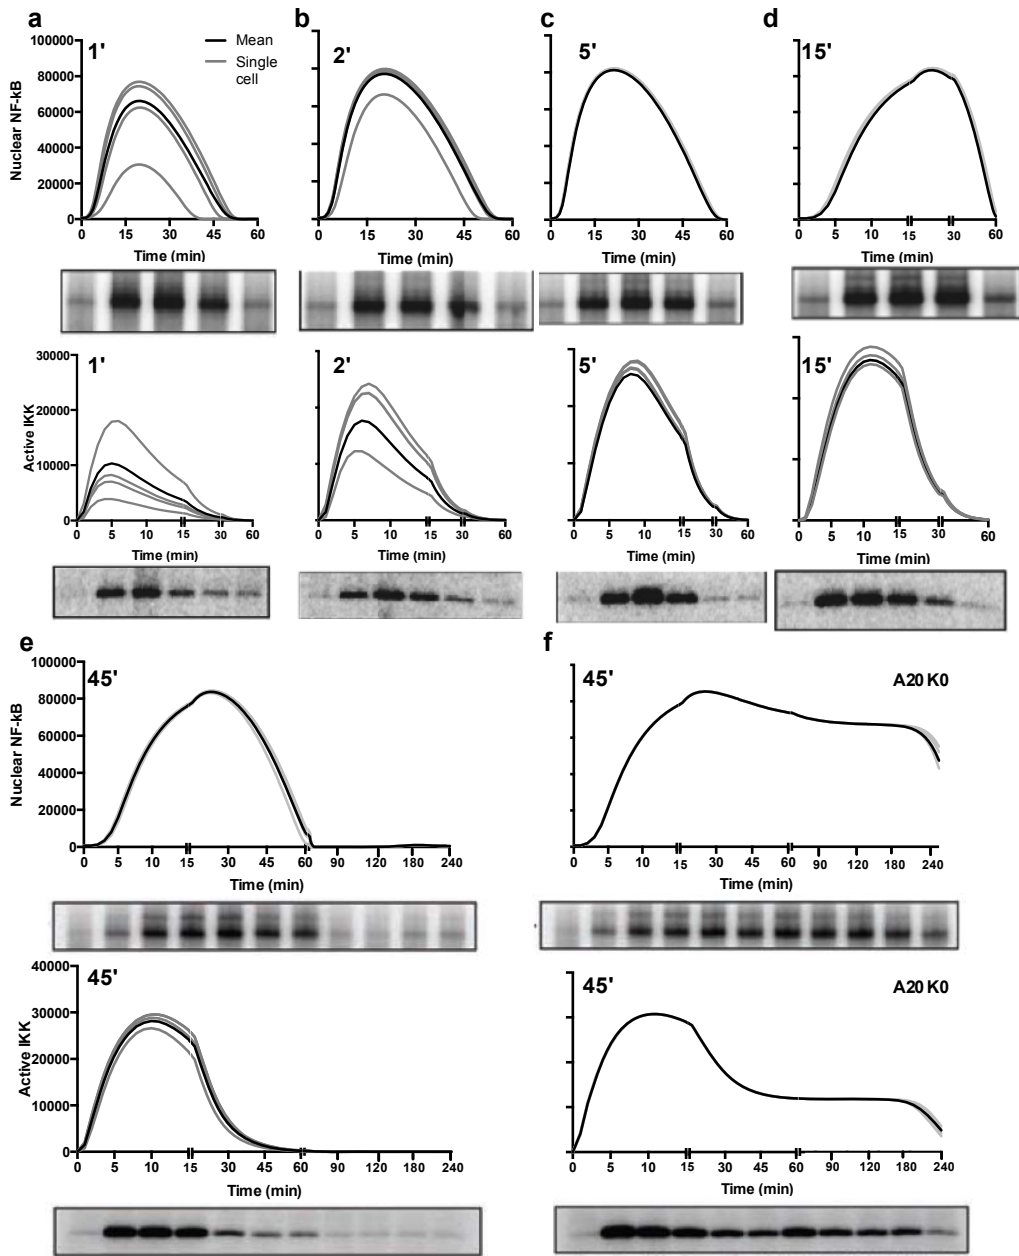

**Supplementary Figure 20. A20-regulated IKK and NF- $\kappa$ B activity following a single  $1 \text{ ng ml}^{-1}$  TNF $\alpha$  pulse of different duration.** (a-d) The comparison between model simulations and the level of nuclear NF- $\kappa$ B activity (based on electrophoretic mobility shift assay, top) and IKK activity (bottom) in response to a single 1, 2, 5 and 15 min TNF $\alpha$  pulse. Shown is the simulated number of active IKK and nuclear NF- $\kappa$ B molecules between (representative cells and population average (300 cells, black), and the blotting data from <sup>3</sup>). (e and f) Responses to 45 min pulse in WT and A20 KO MEFs. Blotting data reproduced from <sup>4</sup>.

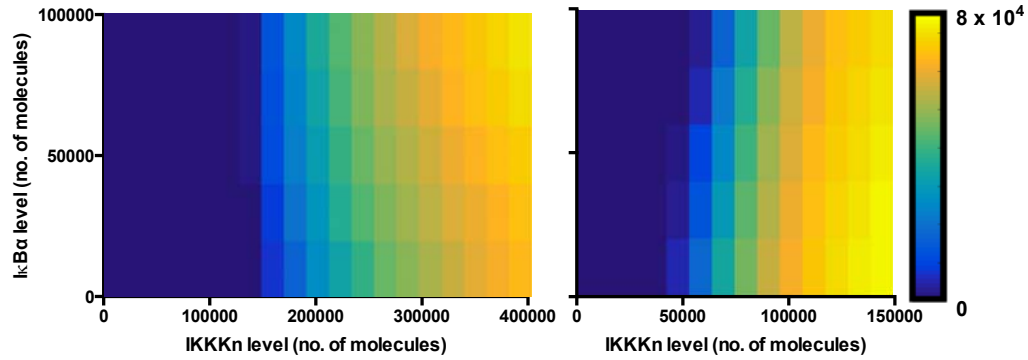

**Supplementary Figure 21. Refractory state is independent of IκBα negative feedback.** The amplitude of NF-κB nuclear translocation in response to TNFα pulses at 60 (left) and 80 min (right) depended on the simulated IKKKn, but not IκBα protein level. Region in yellow corresponds to parameter values that induce NF-κB activation at the 2<sup>nd</sup> pulse, while in the blue region no activation was elicited (scale as in Fig. 4b corresponding to the net nuclear NF-κB translocation at the time of 2<sup>nd</sup> TNFα pulse).

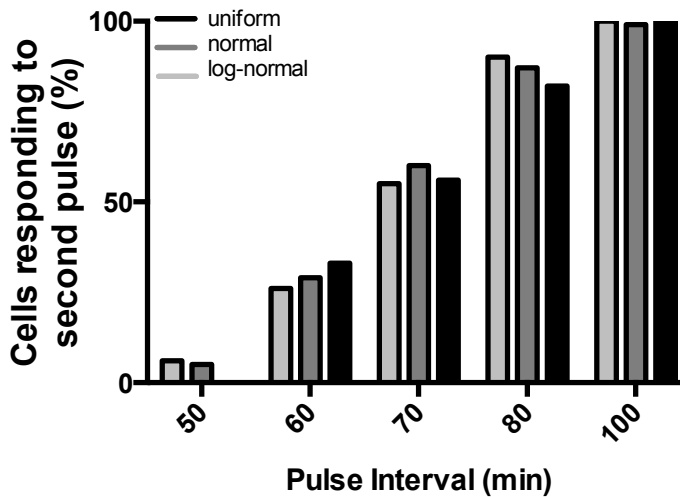

**Supplementary Figure 22. Refractory period can be explained by different IKKKn distributions.** Shown are 300 single cells simulated with the total IKKKn levels assuming normal (as in Fig. 4c-e,  $\mu = 10^5$ ,  $\sigma = 0.3 * \mu$ ), log-normal ( $\mu = 11.5$ ,  $\sigma = 0.3$ ) or uniform ( $U(5 \times 10^5, 15 \times 10^5)$ ) distribution.

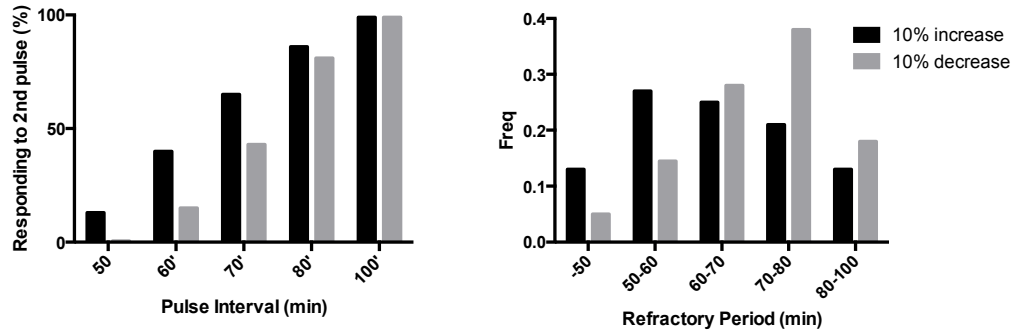

**Supplementary Figure 23. Refractory period distribution depends on the mean IKKK level.** Shown is the fraction of responding cells (left) and the refractory period distribution (right) in response to 10% change of mean  $\mu$  (nominal value of  $10^6$ ) of the IKKK distribution. 300 single cell simulated per condition, standard deviation set to  $\sigma=0.3\mu'$ , where  $\mu'$  is the respective mean.

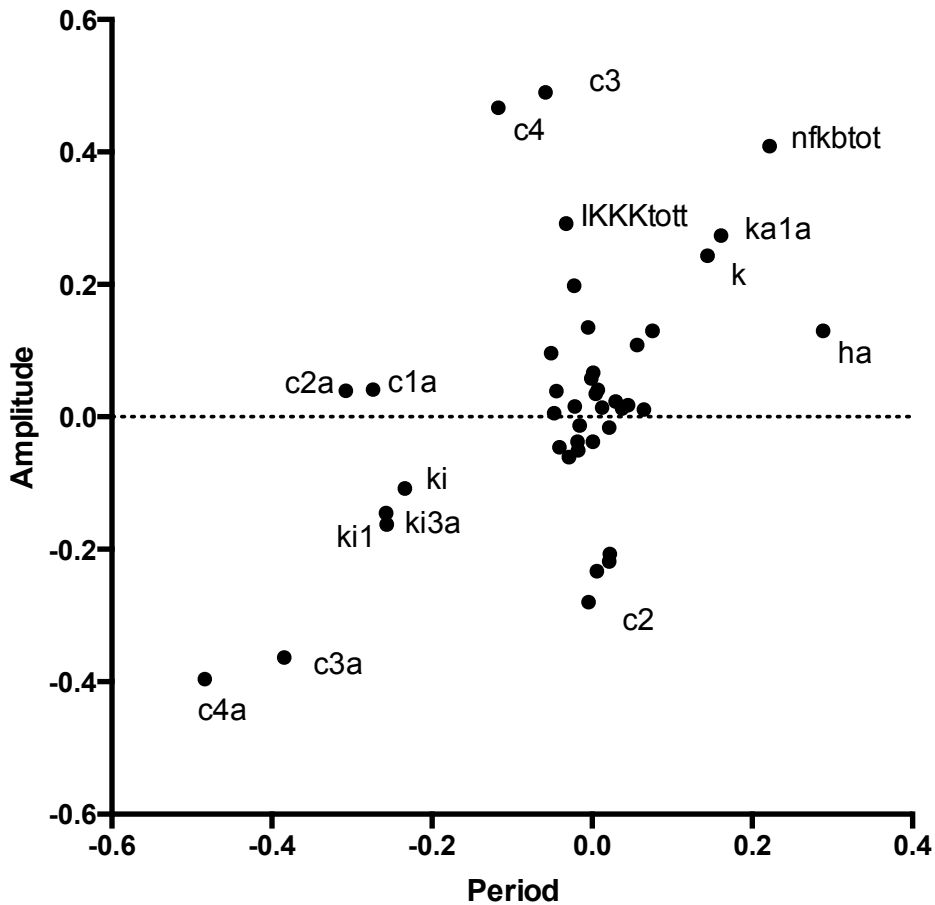

**Supplementary Figure 24. Global sensitivity analysis of NF- $\kappa$ B oscillations in response to continuous TNF $\alpha$  stimulation.** Shown is the correlation between sensitivity scores for the amplitude (on Y-axis) and the period (on X-axis) of NF- $\kappa$ B nuclear oscillations. Most sensitive parameters (labelled on the graph) include those related to I $\kappa$ B $\alpha$  and A20 transcription, translation and half-life, NF- $\kappa$ B transport, total level of NF- $\kappa$ B and IKKK.

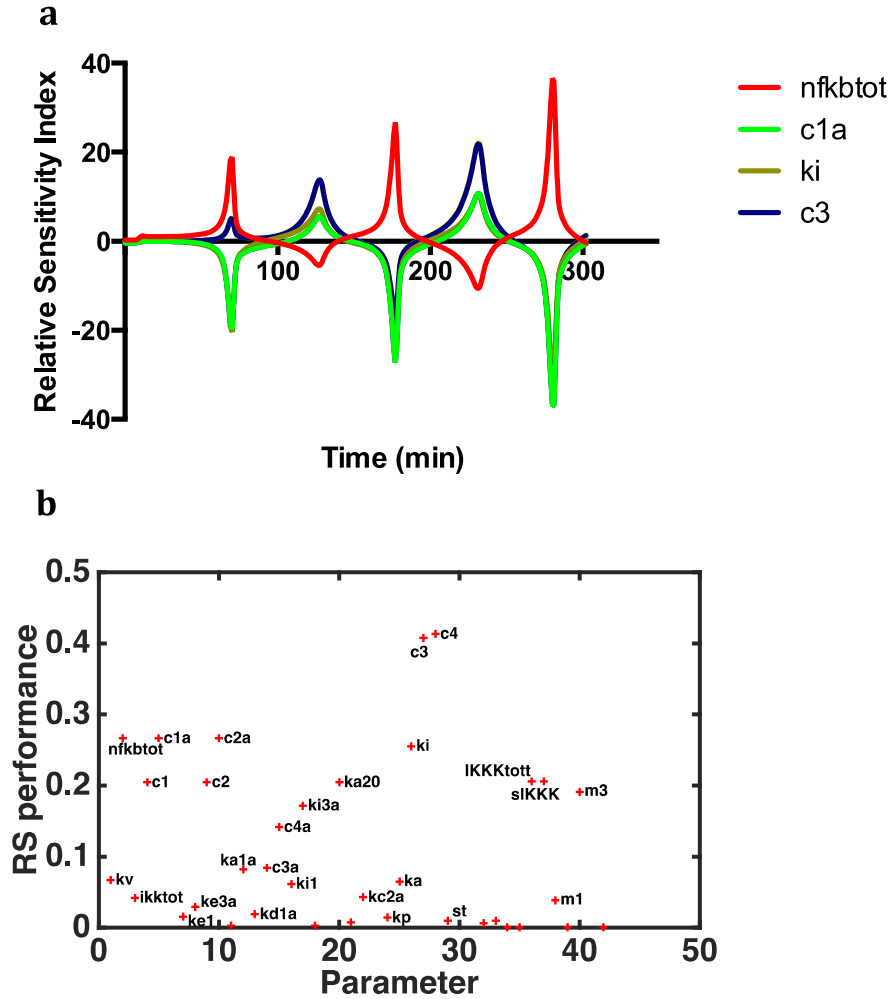

**Supplementary Figure 25. Dynamic sensitivity analysis of NF- $\kappa$ B activation in response to continuous 10 ng ml<sup>-1</sup> TNF $\alpha$  stimulation.** (a) Temporal sensitivity coefficients of NF- $\kappa$ B p65 nuclear translocation trajectory. Colour lines correspond to most sensitive model parameters, I $\kappa$ B $\alpha$  transcription rate (c1a), IKK inactivation rate (*ki*), A20 protein half-life (c3), and NF- $\kappa$ B level (*nfkb tot*). (b) Relative sensitivity (RS) performance is shown with respect to nuclear NF- $\kappa$ B level for all model parameters (calculated as an average temporal sensitivity coefficient over the 300 min trajectory). Names of most sensitive parameters indicated on the graph.

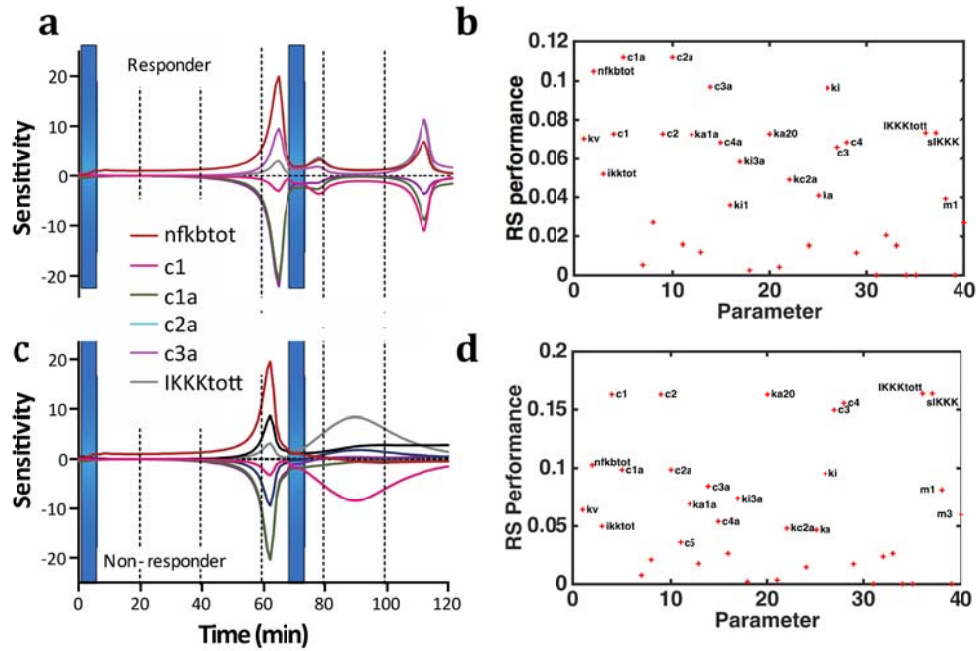

**Supplementary Figure 26. Temporal sensitivity coefficients of NF- $\kappa$ B p65 nuclear translocation trajectory in response to TNF $\alpha$  pulses at 70 min interval.** Coloured lines correspond to sensitivity scores calculated for different model parameters: I $\kappa$ B $\alpha$  and A20 (*c1*, *c1a*, *c3a*), IKKK (*IKKKtott*) and NF- $\kappa$ B level (*nfkbtot*) for a “responding” (a, b) with relative sensitivity index (RS, calculated as an average sensitivity coefficient over the 120 min trajectory), and “non-responding” (c, d) cell. Responding and non-responding cells simulated with total IKKK equal to  $1.5 \times 10^5$  and  $7 \times 10^4$  molecules, respectively.

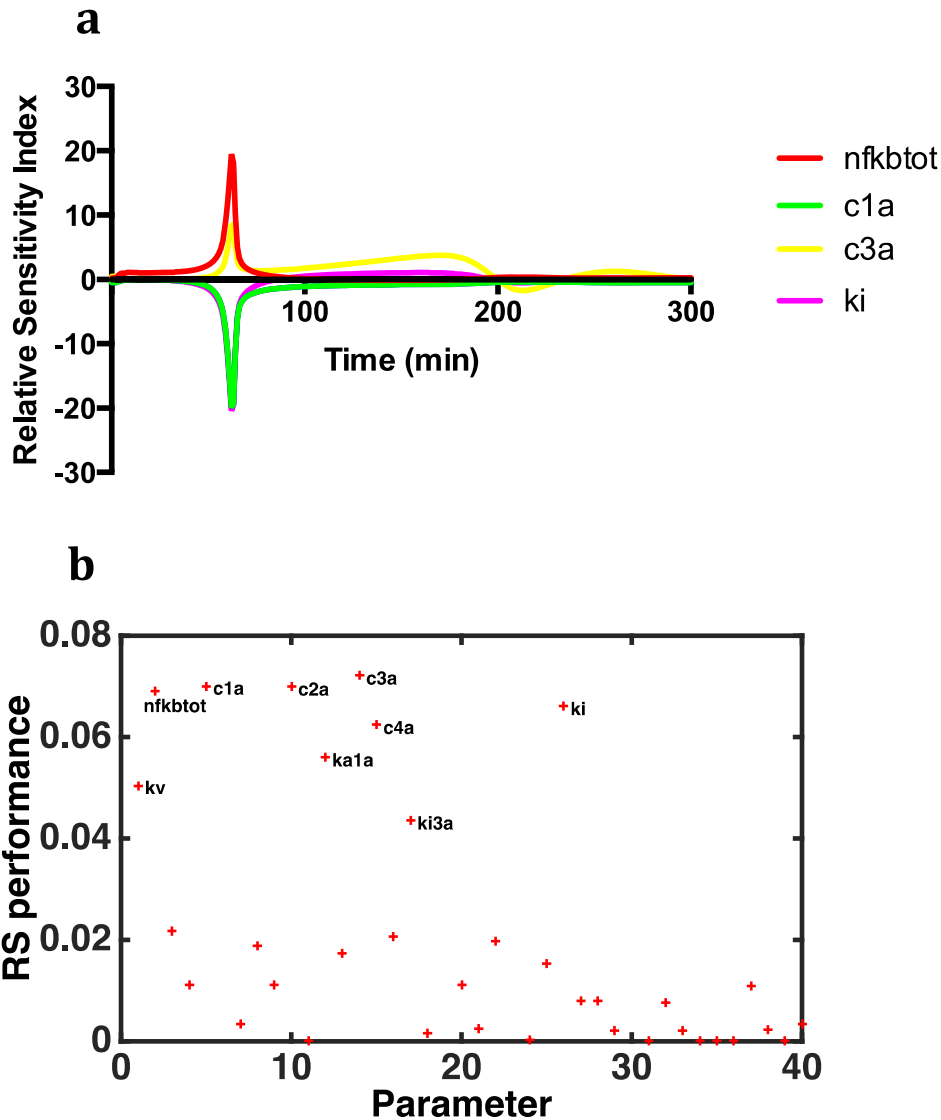

**Supplementary Figure 27. Dynamic sensitivity analysis of NF- $\kappa$ B activation in response to a single 5 min pulse of  $10 \text{ ng ml}^{-1}$  TNF $\alpha$ .** (a) Temporal relative sensitivity coefficients of NF- $\kappa$ B p65 nuclear translocation trajectory. Colour lines correspond to most sensitive model parameters, I $\kappa$ B $\alpha$  transcription, translation and mRNA half-life rate (c1a, c2a, c3a), and NF- $\kappa$ B level (*nfkbtot*). (b) Relative sensitivity (RS) performance with respect to nuclear NF- $\kappa$ B level for all model parameters (calculated as an average temporal sensitivity coefficient over the 300 min trajectory). Names of most sensitive parameters indicated on the graph.

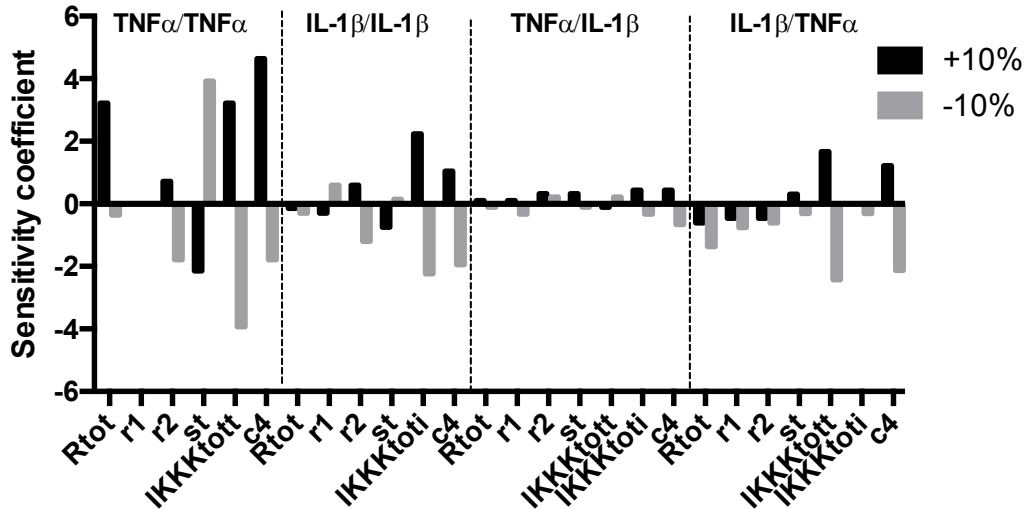

**Supplementary Figure 28. Sensitivity analysis of the  $TNF\alpha$  and  $IL-1\beta$  receptor modules.** Shown is the comparison of sensitivity coefficient calculated with respect to receptor parameters (total  $TNF\alpha$  and  $IL-1\beta$  receptors ( $R_{tot}$ ), receptor activation rate/cytokine binding rate ( $r_1$ ); receptor de-activation rate ( $r_2$ ), half maximal receptor activation ( $st$ )) and IKKK-related parameters (total IKKK in  $TNF\alpha$  and  $IL-1\beta$  pathway ( $IKKK_{tott}$  and  $IKKK_{toti}$ , respectively) and A20 degradation rate ( $c_4$ )). Sensitivity coefficients calculated based on the fraction of 300 simulated cells responding to cytokine pulses at a 60 min interval (as indicated on the graph) with respect to 10% parameter change.

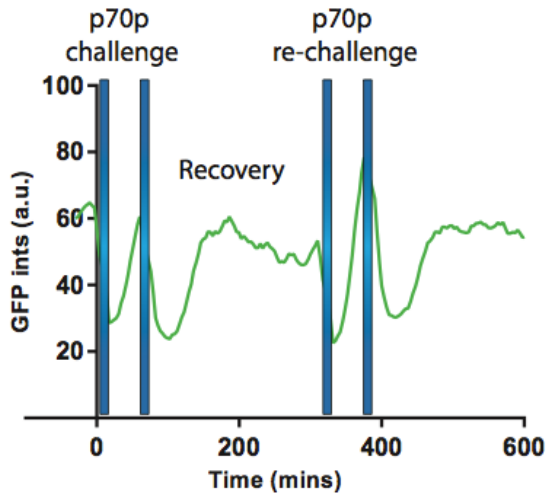

**Supplementary Figure 29. Schematics of the  $TNF\alpha$  equilibrated pulses experiment.** Cells were stimulated with 5 min  $TNF\alpha$  pulses at 70 min interval (p70p) in two sets separated by a 4h equilibration period. Shown is a normalized  $I\kappa B\alpha$ -eGFP trajectory of a representative single C9 cell. Timing of the  $TNF\alpha$  pulses represented with blue bars.



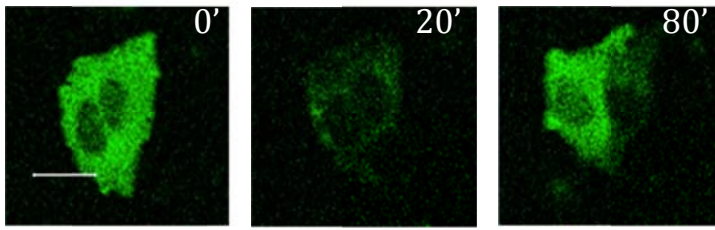

**Supplementary Figure 30. Confocal microscopy images of representative daughter cell responses.** Both C9 daughter cells respond to the first TNF $\alpha$  (depicted at 20 min after stimulation), but exhibit heterogeneous responses to the second pulse (depicted at 80 min after start of the experiment). Shown is the I $\kappa$ B $\alpha$ -eGFP fluorescence signal. Scale bar denotes 20  $\mu$ m.

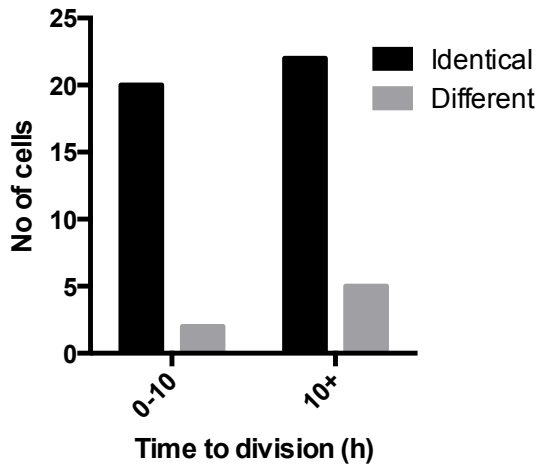

**Supplementary Figure 31. Analysis of daughter cell responses.** Correlation between daughter cell responses (as in Fig. 5H) and the time from division at stimulation (stratified into <10h or >10h intervals).

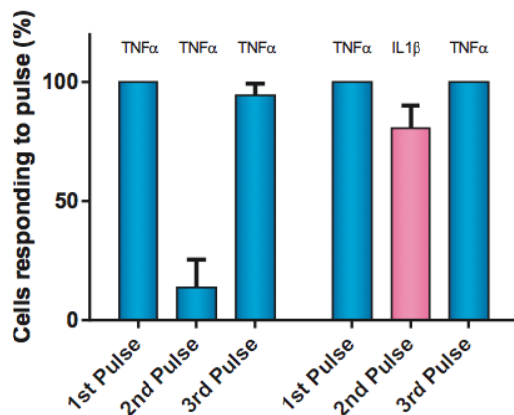

**Supplementary Figure 32. Single cell responses to 50 min TNF $\alpha$  and IL-1 $\beta$  pulses.** Shown is the fraction (mean  $\pm$  s.d.) of responding C9 cells to respective stimulation as determined by the p65-mCherry translocation. Timing of TNF $\alpha$

and IL-1 $\beta$  pulses represented with blue and pink bars, respectively. Data from Fig 6a.

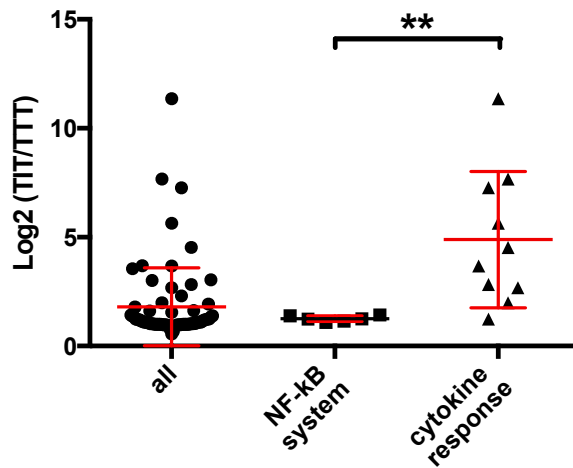

**Supplementary Figure 33. Differential gene expression analysis between TNF $\alpha$ /IL-1 $\beta$ /TNF $\alpha$  (TIT) and TNF $\alpha$ /TNF $\alpha$ /TNF $\alpha$  (TTT) stimulation.** Shown are log2 of expression fold changes for NF- $\kappa$ B system genes (A20, I $\kappa$ B $\alpha$ , I $\kappa$ B $\epsilon$ , Rel, RelB, NF- $\kappa$ B1, NF- $\kappa$ B2) and cytokine response genes (CXCL2, CXCL1, IL8, TNFAIP6, CSF2, TNF $\alpha$ , LIF, IL-1 $\beta$ , CCL2), in comparison to two groups merged together (all). Shown in red are respective means ( $\pm$  s.d.) of three replicates. “\*\*” denotes a statistical difference (at  $p < 0.01$ ) assessed by Mann-Whitney test (see *Supplementary Data 1*).

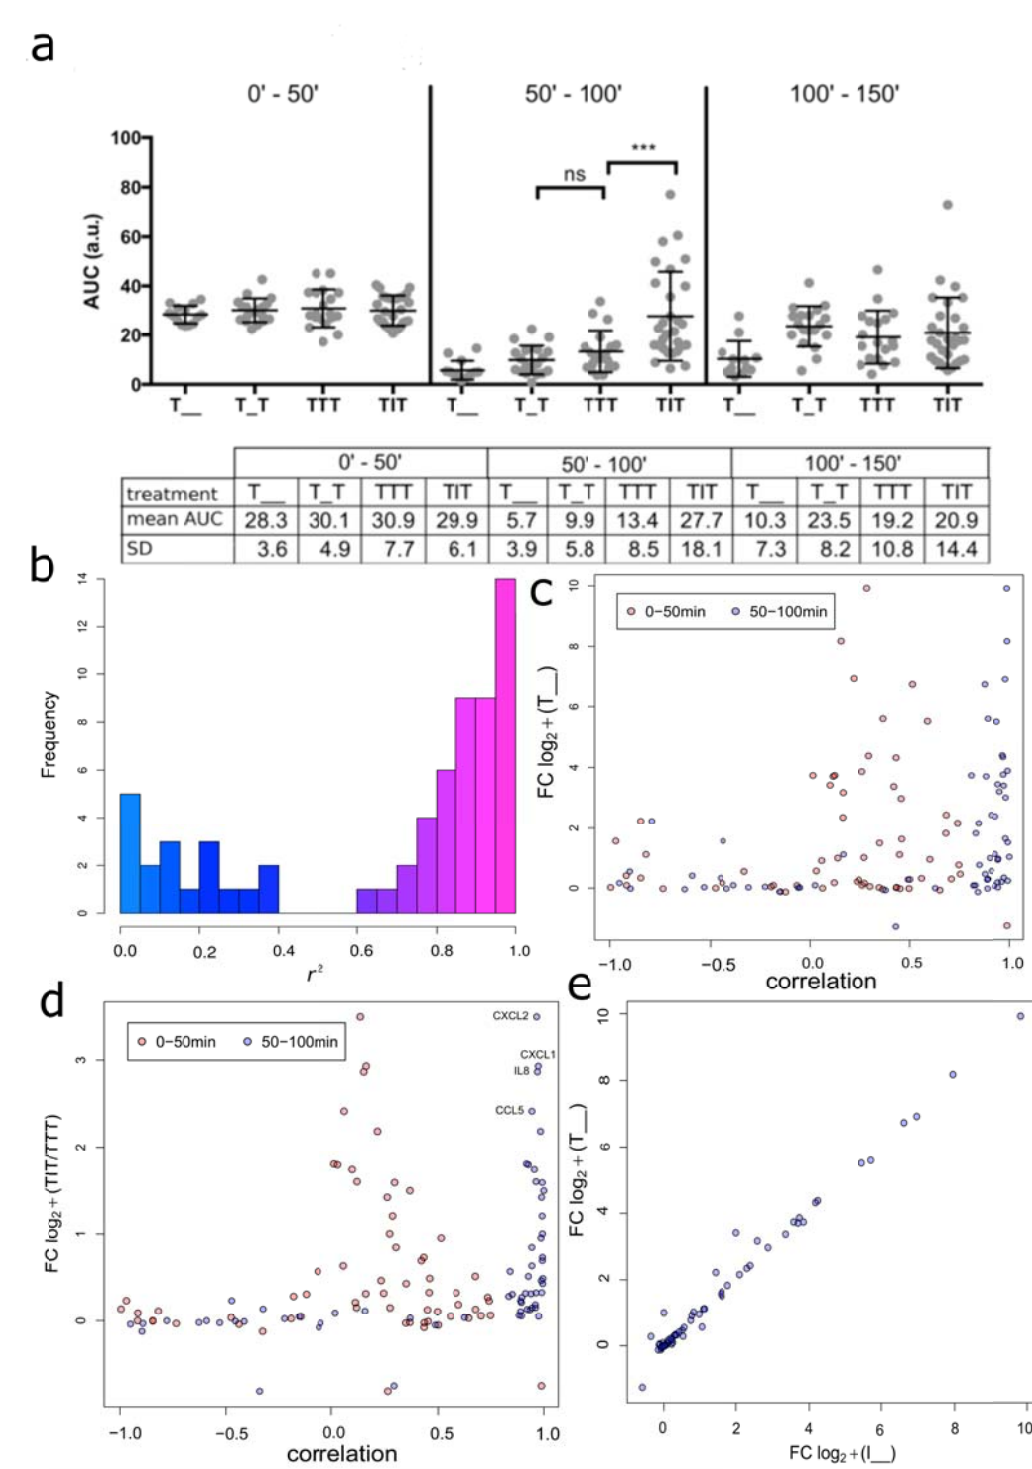

**Supplementary Figure 34. Correlation of the single cell microscopy and gene expression (Nanostring) data.** (a) Area under the curve (AUC) of nuclear p65-mCherry intensity at different time intervals with varying treatment regimes (as in Fig. 6c). Shown is the mean AUC (top row)  $\pm$  s.d. (bottom row) of p65-mCherry base-line corrected trajectories normalized to the first peak amplitude. Statistical significance assessed based on the Kruskal-Wallis with post-hoc Mann-Whitney comparisons test (ns-not significant, \*\*\* p value =

0.0005) (b) Histogram of the coefficient of determination ( $r^2$ , on the x-axis) for the correlation between AUC values at 50-100 minutes and corresponding gene expression levels for varying treatment regimes. (c) Relationship between the Pearson correlation ( $r$ , x-axis) calculated between mean NF- $\kappa$ B AUC in single cells and the gene expression patterns, and the fold-change (from untreated, y-axis) in gene expression in response to single pulse of TNF $\alpha$ . Shown in red is the correlation coefficient calculated for AUC between 0-50 min, and in blue for 50-100 min time interval (d) Relationship between the Pearson correlation (as in c) and the ratio of the transcript levels post TIT and TTT treatments. (e) Correlation between FC (fold-change) (from untreated) in transcript level between cells treated with a single pulse of IL-1 $\beta$  (I\_ ) and TNF $\alpha$  (T\_ ).

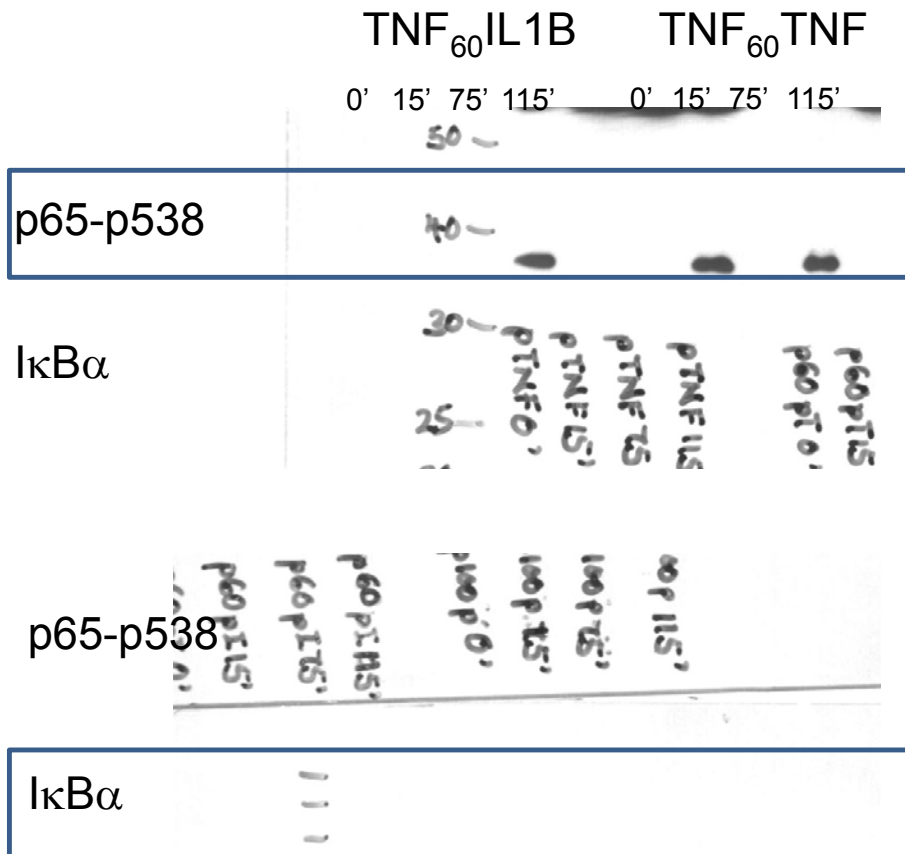

**Supplementary Figure 35. Uncropped scans of the blots in Fig. 3d.** Shown are the two different exposure times. Boxed bands are presented in the manuscript.

| Figure       | Cell line | Protocol               | Number of cells       | Number of replicates | Notes                   |
|--------------|-----------|------------------------|-----------------------|----------------------|-------------------------|
| <b>1F</b>    | C9        | T Cont.                | <b>163</b>            | >3                   |                         |
|              |           | I Cont.                | <b>94</b>             | 3                    |                         |
|              | C9L       | T Cont.                | <b>30</b>             | 3                    |                         |
|              |           | I Cont.                | <b>47</b>             | 3                    |                         |
| <b>1D</b>    | C9        | T, I Cont.             | <b>37, 57</b>         | 1 replicate          | subset of 1F from 1F    |
|              | C9L       |                        | <b>30, 47</b>         | 3                    |                         |
| <b>1E</b>    | C9L       | T, I Cont.             | <b>30, 47</b>         | 3                    | from 1F                 |
| <b>2A</b>    | C9        | T                      | <b>63 (20 shown)</b>  | >3                   |                         |
| <b>2B,C</b>  | C9        | TT, 60 min             | <b>113</b>            | 3                    |                         |
| <b>2F</b>    | C9        | TT, 50 min             | <b>61</b>             | 2                    | From 2B,C               |
|              |           | TT, 60 min             | <b>113</b>            | 3                    |                         |
|              |           | TT, 70 min             | <b>79</b>             | 2                    |                         |
|              |           | TT, 80 min             | <b>63</b>             | 2                    |                         |
|              |           | TT, 100 min            | <b>57</b>             | 2                    |                         |
| <b>2I</b>    | C9L       | TT, 60 min             | <b>36</b>             | 2                    |                         |
|              |           | TT, 100 min            | <b>19</b>             | 2                    |                         |
| <b>2J</b>    | C9L       | T Cont.                | <b>30</b>             |                      | from 1D subset of 2I 2I |
|              |           | TT, 60 min             | <b>12</b>             | 2                    |                         |
|              |           | TT, 100 min            | <b>19</b>             | 2                    |                         |
| <b>S. 9</b>  | C9        | I                      | <b>35</b>             | 2                    | with IL-1 anti-body     |
|              |           | I pulse                | <b>37</b>             | 2                    |                         |
|              |           | II, 60 min             | <b>39</b>             | 2                    |                         |
|              |           | IT, 60 min             | <b>42</b>             | 2                    |                         |
| <b>3A</b>    | C9        | T I, 60 min            | <b>95</b>             | 3                    |                         |
| <b>3B</b>    | C9        | TI, 60 min             | <b>95</b>             | 3                    | From 3B From 2F         |
|              |           | TT, 60 min             | <b>115</b>            | 3                    |                         |
| <b>3C</b>    | C9L       | TT, 60 min             | <b>36</b>             | 2                    | From 2I                 |
|              |           | TI, 60 min             | <b>47</b>             | 3                    |                         |
| <b>4H</b>    | C9        | TT, 60 min, A20 siRNA  | <b>78</b>             | 4                    |                         |
|              |           | TT, 60 min, neg. siRNA | <b>35</b>             | 2                    |                         |
| <b>5D</b>    | C9        | TTTT (Equilibrated)    | <b>79</b>             | 2                    |                         |
| <b>5J</b>    | C9        | TT, 70 min             | <b>112 (56 pairs)</b> | 2                    |                         |
| <b>6B</b>    | C9        | TTT, 50 min            | <b>19</b>             | 3                    |                         |
|              |           | TIT, 50 min            | <b>29</b>             | 3                    |                         |
| <b>S. 13</b> | C9        | T pulse                | <b>25</b>             | 2                    | Dynasore                |
| <b>S. 18</b> | C9        | TT, 60 min             | <b>78</b>             | 2                    | Low dose                |
|              |           | TT, 60 min             | <b>30</b>             | 2                    | High dose               |
| <b>S. 34</b> | C9L       | T __, 50 min           | <b>14</b>             | 2                    | From 2I From 6B From 6B |
|              |           | T_T, 50 min            | <b>19</b>             | 2                    |                         |
|              |           | TTT, 50 min            | <b>19</b>             | 3                    |                         |
|              |           | TIT, 50 min            | <b>29</b>             | 3                    |                         |

**Supplementary Table 1. Imaging conditions and number of cells used in the study.** T and I in the simulation protocol refer to TNF $\alpha$  and IL-1 $\beta$  treatments, respectively.

| Variable                             | Description                                              | Variable                             | Description                                          |
|--------------------------------------|----------------------------------------------------------|--------------------------------------|------------------------------------------------------|
| TNF                                  | Extracellular TNF $\alpha$                               | IL1                                  | Extracellular IL-1 $\beta$                           |
| Rnt                                  | Neutral TNFR (receptor)                                  | Rni                                  | Neutral IL1R (receptor)                              |
| Rt                                   | Active TNFR (receptor)                                   | Ri                                   | Active IL1R (receptor)                               |
| IKKK <sub>n<sub>t</sub></sub>        | Neutral form of IKKK (TNFR pathway)                      | IKKK <sub>n<sub>i</sub></sub>        | Neutral form of IKKK (IL1R pathway)                  |
| IKKK <sub>a<sub>t</sub></sub>        | Active form of IKKK (TNFR pathway)                       | IKKK <sub>a<sub>i</sub></sub>        | Active form of IKKK (IL1R pathway)                   |
| IKKK <sub>i<sub>t</sub></sub>        | Inactive form of IKKK (TNFR pathway)                     | IKKK <sub>i<sub>i</sub></sub>        | Inactive form of IKKK (IL1R pathway)                 |
| IKK <sub>n</sub>                     | Neutral form of IKK                                      | IKK <sub>a</sub>                     | Active form of IKK                                   |
| IKK <sub>i</sub>                     | Inactive form of IKK                                     | NF $\kappa$ B                        | Free cytoplasmic NF $\kappa$ B protein               |
| nNF $\kappa$ B                       | Free nuclear NF- $\kappa$ B                              | I $\kappa$ B $\alpha$                | Free cytoplasmic I $\kappa$ B $\alpha$               |
| nI $\kappa$ B $\alpha$               | Free nuclear I $\kappa$ B $\alpha$                       | tI $\kappa$ B $\alpha$               | I $\kappa$ B $\alpha$ transcript                     |
| A20                                  | Cytoplasmic A20 protein                                  | tA20                                 | A20 transcript                                       |
| NF $\kappa$ B I $\kappa$ B $\alpha$  | Cytoplasmic NF- $\kappa$ B I $\kappa$ B $\alpha$ complex | nNF $\kappa$ B I $\kappa$ B $\alpha$ | Nuclear NF- $\kappa$ B I $\kappa$ B $\alpha$ complex |
| pNF $\kappa$ B I $\kappa$ B $\alpha$ | Phospho-I $\kappa$ B $\alpha$ :NF- $\kappa$ B complex    |                                      |                                                      |

**Supplementary Table 2. Description of NF- $\kappa$ B model variables.** Variables are quantified in the number of molecules. Letter *n* denotes nuclear variable, *t* denotes mRNA transcript, while *p* denotes phosphorylated form of I $\kappa$ B $\alpha$ .

1.  $ddt(NF-\kappa B) = kd1a * I\kappa B\alpha NF\kappa B - ka1a * I\kappa B\alpha * NF\kappa B - ki1 * NF\kappa B + kv * ke1 * nNF\kappa B + kt2a * pI\kappa B\alpha NF\kappa B$
2.  $ddt(I\kappa B\alpha) = kd1a * I\kappa B\alpha NF\kappa B - ka1a * I\kappa B\alpha * NF\kappa B - ki3a * I\kappa B\alpha + kv * ke3a * nI\kappa B\alpha - c4a * I\kappa B\alpha + c2a * tI\kappa B\alpha - kc1a * IKK * I\kappa B\alpha$
3.  $ddt(I\kappa B\alpha NF\kappa B) = ka1a * I\kappa B\alpha * NF\kappa B - kd1a * I\kappa B\alpha NF\kappa B + kv * ke2a * nI\kappa B\alpha NF\kappa B - kc2a * IKKa * I\kappa B\alpha NF\kappa B$
4.  $ddt(nNF\kappa B) = kd1a * nI\kappa B\alpha NF\kappa B - ka1a * kv * nI\kappa B\alpha * nNF\kappa B + ki1 * NF\kappa B - kv * ke1 * nNF\kappa B$
5.  $ddt(nI\kappa B\alpha) = kd1a * nI\kappa B\alpha NF\kappa B - ka1a * kv * nI\kappa B\alpha * nNF\kappa B + ki3a * I\kappa B\alpha - kv * ke3a * nI\kappa B\alpha - c4a * nI\kappa B\alpha$
6.  $ddt(nI\kappa B\alpha nNF\kappa B) = ka1a * kv * nI\kappa B\alpha * nNF\kappa B - kd1a * nI\kappa B\alpha NF\kappa B - kv * ke2a * nI\kappa B\alpha NF\kappa B$
7.  $ddt(tI\kappa B\alpha) = c1a * (nNF\kappa B^h / (nNF\kappa B^h + k^h)) - c3a * tI\kappa B\alpha$
8.  $ddt(IKKn) = kp * (ikktot - IKKa - IKKn) - (IKKKat^ha / (IKKKat^ha + (sIKKK)^ha)) * ka * IKKn - (IKKKai^ha / (IKKKai^ha + (sIKKK)^ha)) * ka * IKKn$
9.  $ddt(IKK) = (IKKKat^ha / (IKKKat^ha + (sIKKK)^ha)) * ka * IKKn - ki * IKK + (IKKKai^ha / (IKKKai^ha + (sIKKK)^ha)) * ka * IKKn$
10.  $ddt(tA20) = c1 * (nNF\kappa B^h / nNF\kappa B^h + k^h) - c3 * tA20$
11.  $ddt(A20) = c2 * tA20 - c4 * A20$
12.  $ddt(IKKKtn) = m3 * (IKKKtott - IKKKat - IKKKnt) - (Rt / (Rt + st)) * m1 * (IKKKtn)$
13.  $ddt(IKKKt) = (Rt / (Rt + st)) * m1 * (IKKKnt) - (m2 + ka20 * A20) * IKKKat;$
14.  $ddt(Rt) = q1 * TNF * (Rtot - Rt) - q2 * Rt;$
15.  $ddt(TNF) = -c5 * TNF - q1 * TNF * (Rtot - Rt)$
16.  $ddt(IKKKin) = m3 * (IKKKtoti - IKKKai - IKKKni) - (Ri / (Ri + st)) * m1 * (IKKKni)$
17.  $ddt(IKKKi) = (Ri / (Ri + st)) * m1 * (IKKKni) - (m2 + ka20 * A20) * IKKKai$
18.  $ddt(Ri) = q1 * IL1 * (Rtot - Ri) - q2 * Ri$
19.  $ddt(IL1) = -c5 * IL1 - q1 * IL1 * (Rtot - Ri)$

**Supplementary Table 3. Rate-equations for the deterministic mathematical model of NF- $\kappa$ B signalling.**  $ddt(X)$  denotes the derivative of X with respect to time.



| Parameter                                                                                                   | Symbol   | Value                                | Ashall et al., 2010                   | Reference           |
|-------------------------------------------------------------------------------------------------------------|----------|--------------------------------------|---------------------------------------|---------------------|
| <i>Spatial Parameters</i>                                                                                   |          |                                      |                                       |                     |
| Cytoplasmic/nuclear ratio                                                                                   | kv       | 3.3                                  | 3,3                                   | As in <sup>1</sup>  |
| <i>Initial Concentration</i>                                                                                |          |                                      |                                       |                     |
| Total NF-κB                                                                                                 | nfkbtot  | 10 <sup>5</sup> molecules            | 10 <sup>5</sup> molecules             | As in <sup>1</sup>  |
| Total IKK                                                                                                   | ikktot   | 10 <sup>5</sup> molecules            | 10 <sup>5</sup> molecules             | As in <sup>1</sup>  |
| Total IKKKt                                                                                                 | IKKKtott | 10 <sup>5</sup> molecules            | -                                     | Fitted              |
| Total IKKKi                                                                                                 | IKKKtoti | 1.3x10 <sup>5</sup> molecules        | -                                     | Fitted              |
| <i>IKK</i>                                                                                                  |          |                                      |                                       |                     |
| IKKn → IKKa<br><i>Order of hill function, ha=3</i><br><i>Half-max constant, sIKK=350 (fitted)</i>           | ka       | 0.0014 s <sup>-1</sup>               | 0.003 s <sup>-1</sup>                 | Re-fitted           |
| IKKa → IKKi                                                                                                 | ki       | 0.002 s <sup>-1</sup>                | 0.002 s <sup>-1</sup>                 | As in <sup>1</sup>  |
| IKKi → IKKn                                                                                                 | kp       | 0.00033 s <sup>-1</sup>              | -                                     | Fitted              |
| <i>IKKK</i>                                                                                                 |          |                                      |                                       |                     |
| IKKKn → IKKKa<br><i>Order of hill function, ha=3</i><br><i>Half-max constant, st=50 (fitted)</i>            | m1       | 0.005 s <sup>-1</sup>                | -                                     | Fitted              |
| IKKKa → IKKKi                                                                                               | m2       | 0.0005 s <sup>-1</sup>               | -                                     | Fitted              |
| IKKKi → IKKKn                                                                                               | m3       | 0.0005 s <sup>-1</sup>               | -                                     | Fitted              |
| IKKKa → IKKKi (A20 mediated)                                                                                | ka20     | 0.00023 s <sup>-1</sup>              | -                                     | Fitted              |
| <i>Complex formation and dissociation</i>                                                                   |          |                                      |                                       |                     |
| IκBα + NF-κB → IκBα·NF-κB                                                                                   | ka1a     | 8×10 <sup>-7</sup> s <sup>-1</sup>   | 4×10 <sup>-7</sup> s <sup>-1</sup>    | Re-fitted           |
| IκBα·NF-κB → IκBα + NF-κB                                                                                   | kd1a     | 8×10 <sup>-4</sup> s <sup>-1</sup>   | 5×10 <sup>-4</sup> s <sup>-1</sup>    | Re-fitted           |
| <i>IκBα protein synthesis and degradation</i>                                                               |          |                                      |                                       |                     |
| nNF-κB → nNF-κB + tIκBα<br><i>Order of hill function, h=2</i><br><i>Half-max constant, k=0.002 (fitted)</i> | c1a      | 0.2 s <sup>-1</sup>                  | 0.08 s <sup>-1</sup>                  | Re-fitted           |
| tIκBα → tIκBα + IκBα                                                                                        | c2a      | 0.5 s <sup>-1</sup>                  | 0.5 s <sup>-1</sup>                   | As in <sup>1</sup>  |
| tIκBα → Sink                                                                                                | c3a      | 0.00044 s <sup>-1</sup>              | 0.0003 s <sup>-1</sup>                | Re-fitted           |
| IκBα → Sink                                                                                                 | c4a      | 0.00076 s <sup>-1</sup>              | 0.0005 s <sup>-1</sup>                | Re-fitted           |
| <i>A20 Protein synthesis and degradation</i>                                                                |          |                                      |                                       |                     |
| nNF-κB → nNF-κB + tA20<br><i>Order of hill function, h=2</i><br><i>Half-max constant, k=0.002 (fitted)</i>  | c1       | 0.005 s <sup>-1</sup>                | 0.0873 s <sup>-1</sup>                | assumed             |
| tA20 → tA20 + A20                                                                                           | c2       | 0.5 s <sup>-1</sup>                  | 0.5 s <sup>-1</sup>                   | As in <sup>1</sup>  |
| tA20 → Sink                                                                                                 | c3       | 0.00066 s <sup>-1</sup>              | 0.00048 s <sup>-1</sup>               | Re-fitted           |
| A20 → Sink                                                                                                  | c4       | 0.00075 s <sup>-1</sup>              | 0.0045 s <sup>-1</sup>                | Re-fitted           |
| <i>Transport</i>                                                                                            |          |                                      |                                       |                     |
| NF-κB → nNF-κB                                                                                              | ki1      | 0.0026 s <sup>-1</sup>               | 0.0026 s <sup>-1</sup>                | As in <sup>1</sup>  |
| nNF-κB → NF-κB                                                                                              | ke1      | 0.00052 s <sup>-1</sup>              | 0.00017 s <sup>-1</sup>               | ki1/50 <sup>5</sup> |
| nIκBα·nNF-κB → IκBα·NF-κB                                                                                   | ke2a     | 0.01 s <sup>-1</sup>                 | 0.01 s <sup>-1</sup>                  | As in <sup>1</sup>  |
| IκBα → nIκBα                                                                                                | ki3a     | 0.001 s <sup>-1</sup>                | 0.002 s <sup>-1</sup>                 | Re-fitted           |
| nIκBα → IκBα                                                                                                | ke3a     | 0.0005 s <sup>-1</sup>               | 0.01 s <sup>-1</sup>                  | ki3a/2 <sup>5</sup> |
| <i>Base Module IKK Interaction Parameters</i>                                                               |          |                                      |                                       |                     |
| IKKa + IκBα → pIκBα                                                                                         | kc1a     | 9.8×10 <sup>-8</sup> s <sup>-1</sup> | 2.96×10 <sup>-7</sup> s <sup>-1</sup> | Re-fitted           |
| IKKa + IκBα·NF-κB → pIκBα·NF-κB                                                                             | kc2a     | 8.5×10 <sup>-7</sup> s <sup>-1</sup> | 2.96×10 <sup>-7</sup> s <sup>-1</sup> | Re-fitted           |
| pIκBα·NF-κB → Sink                                                                                          | kt2a     | 0.1 s <sup>-1</sup>                  | 0.1 s <sup>-1</sup>                   | As in <sup>1</sup>  |
| <i>Receptor Module</i>                                                                                      |          |                                      |                                       |                     |
| Total receptor                                                                                              | Rtot     | 2500                                 | -                                     | assumed             |
| Rn + TNFα → Rt<br>(the same assumed for IL-1R)                                                              | r1       | 4×10 <sup>-9</sup> s <sup>-1</sup>   | -                                     | assumed             |
| Rt → Rn<br>(the same assumed for IL-1R)                                                                     | r2       | 0.0032 s <sup>-1</sup>               | -                                     | assumed             |
| TNF/IL1 → sink                                                                                              | c5       | 0.000037 s <sup>-1</sup>             | -                                     | assumed             |

**Supplementary Table 4. Parameter values for the deterministic NF-κB model.**

| Parameter                                                                                   | Symbol | Value                     | Reference                 |
|---------------------------------------------------------------------------------------------|--------|---------------------------|---------------------------|
| $nNF-\kappa B + GI\kappa B\alpha(0) \rightarrow nNF-\kappa B + GI\kappa B\alpha(1)$         | q1a    | $4 \times 10^{-7} s^{-1}$ | 6                         |
| $nNF-\kappa B + GA20(0) \rightarrow nNF-\kappa B + GA20(1)$                                 | q1     | $4 \times 10^{-8} s^{-1}$ | Assumed                   |
| $nI\kappa B\alpha + GI\kappa B\alpha(1) \rightarrow nI\kappa B\alpha + GI\kappa B\alpha(0)$ | q2a    | $10^{-6} s^{-1}$          | 6                         |
| $nI\kappa B\alpha + GA20(1) \rightarrow nI\kappa B\alpha + GA20(0)$                         | q2     | $10^{-6} s^{-1}$          | 6                         |
| $nNF-\kappa B \rightarrow nNF-\kappa B + tI\kappa B\alpha$                                  | c1a*   | c1a/2                     | Assumed                   |
| $GA20(1) \rightarrow GA20(1) + tA20$                                                        | c1*    | c1/2                      | Assumed                   |
| $tA20 \rightarrow \text{sink}$                                                              | c3a    | c3a                       | As in deterministic model |
| $Rn + TNF\alpha \rightarrow Rt$                                                             | r1     | $4 \times 10^{-9} s^{-1}$ | Adapted from <sup>6</sup> |
| $Rt \rightarrow Rn$                                                                         | r2     | $0.0032 s^{-1}$           | Fitted                    |

**Supplementary Table 5. Parameter values for the stochastic NF- $\kappa$ B model.**

| <b>Figure</b>                                               | <b>Model simulation</b>                                   | <b>Parameters varied</b>                                                                                                                                                                                                            |
|-------------------------------------------------------------|-----------------------------------------------------------|-------------------------------------------------------------------------------------------------------------------------------------------------------------------------------------------------------------------------------------|
| 4B                                                          | Deterministic                                             | Total IKKK <sub>t</sub> level varied between 0 – 15x10 <sup>4</sup> and total A20 protein level varied between 0 – 4000 molecules<br>Single cell trajectories simulated with total IKKK <sub>t</sub> = 140,000 and 60,000 molecules |
| 4C,D,E                                                      | Deterministic                                             | Total IKKK <sub>t</sub> ~ N(100000, 30000 <sup>2</sup> )                                                                                                                                                                            |
| 4F                                                          | Deterministic                                             | Total IKKK <sub>t</sub> ~ N(100000, specified in figure)                                                                                                                                                                            |
| 4G                                                          | Deterministic                                             | All parameters changed to 50 or 150% of their respective nominal values                                                                                                                                                             |
| 4I                                                          | Deterministic                                             | Total IKKK <sub>t</sub> ~ N(100000, 30000 <sup>2</sup> )<br>m3 ~ N(6x10 <sup>-4</sup> , 3.2x10 <sup>-8</sup> )<br>c4a ~ N(6x10 <sup>-4</sup> , 5x10 <sup>-8</sup> )                                                                 |
| 5B,C,E                                                      | Deterministic <sup>1</sup> and stochastic gene expression | <sup>1</sup> Total IKKK <sub>t</sub> ~ N(100000, 30000 <sup>2</sup> )                                                                                                                                                               |
| S. 14<br>S. 15<br>S. 16<br>S. 17<br>S. 19<br>S. 20<br>S. 22 | Deterministic                                             | Total IKKK <sub>t</sub> ~ N(100000, 30000 <sup>2</sup> )                                                                                                                                                                            |
| S. 18                                                       | Deterministic <sup>1</sup> and Stochastic receptor        | <sup>1</sup> Total IKKK <sub>t</sub> ~ N(100000, 30000 <sup>2</sup> )                                                                                                                                                               |
| S. 21                                                       | Deterministic                                             | Total IKKK level varied between 0 – 15x10 <sup>4</sup> and total IκBα protein level between 0 – 10x10 <sup>4</sup> molecules                                                                                                        |
| S. 23                                                       | Deterministic                                             | Total IKKK (specified in figure)                                                                                                                                                                                                    |
| S. 24                                                       | Deterministic                                             | All parameters changed to 50 or 150% of their respective nominal values                                                                                                                                                             |
| S. 25<br>S. 26<br>S. 27                                     | Deterministic                                             | Responding and non-responding cell simulated with total IKKK <sub>t</sub> equal to 1.5 x 10 <sup>5</sup> and 7 x 10 <sup>4</sup> molecules, respectively.                                                                           |
| S. 28                                                       | Deterministic                                             | Total IKKK <sub>t</sub> ~ N(100000, 30000 <sup>2</sup> )                                                                                                                                                                            |

**Supplementary Table 6. Models and parameters used for specific simulations performed in the study.**

## Supplementary Note 1: Derivation and validation of stable cell lines.

### Generation of the I $\kappa$ B $\alpha$ -EGFP BAC

The I $\kappa$ B $\alpha$  BAC (CTD-3214F11, obtained from Life Technologies, UK) was maxiprepmed using Machnery-Nagal Nucleobond BAC100 kit and 100ng was used to transform SW102 *E. coli* cells (a kind gift from Neal Copeland) by electroporation (1.8kV, 200 ohm, 25mF). SW102-I $\kappa$ B $\alpha$  positive clones were selected with by Southern blot and pulsed field gel electrophoresis analysis.

For recombination, the 300bp immediately 5' of the I $\kappa$ B $\alpha$  stop codon were amplified by the primers *I $\kappa$ B $\alpha$  5'300H KpnI F* AACTAGGTACCCTTATCAGAGGGGTATCTACATAATGAGTCTCTCAA and *I $\kappa$ B $\alpha$  5'300H Sall R* GGAACAGTCGACTAACGTCAGACGCTGGCCTCCA. The 350bp immediately 3' of the I $\kappa$ B $\alpha$  stop codon were amplified by the primers *I $\kappa$ B $\alpha$  3'350H BamHI F* ATAATAGGATCCGCGCAAAGGGGCTGAAAGAACATG and *I $\kappa$ B $\alpha$  3'350H XbaI R* AATCAATCTAGAACAGGATACCACTGGGGTCAGTCA. The homology arms were sequentially cloned into the pBlueGalK vector either side of the EM7-GalK coding sequence via the restriction tags, first generating pBlueGalK-I $\kappa$ B $\alpha$ <sup>FP</sup>-3' then pBlueGalK-I $\kappa$ B $\alpha$ <sup>FP</sup>-5'/3'. The eGFP coding sequence was amplified with the primers *eGFP EcoRI F* GAGTCCGAATTCATGGTGAGCAAGGGCGAGGAG and *eGFP BamHI R* TTCTGAGGATCCCTACACATTGATCCTAGCAGAAGCACAGG and cloned into the pBlueGalK-I $\kappa$ B $\alpha$ <sup>FP</sup>-5'/3' vector via the EcoRI and BamHI restriction sites to give pBlueGFP-I $\kappa$ B $\alpha$ <sup>FP</sup>-5'/3'.

The pBlueGalK-I $\kappa$ B $\alpha$ <sup>FP</sup>-5'/3' and pBlueGFP-I $\kappa$ B $\alpha$ <sup>FP</sup>-5'/3' vectors were used as a template in a PCR with the primers *I $\kappa$ B $\alpha$  RecCas Amp F* GCTTATCAGAGGGGTATCTACATAATGAGTCTCTC and *I $\kappa$ B $\alpha$  RecCas Amp R* GATACCACTGGGGTCAGTCACTCGA to generate both the H-GalK-H recombination cassette (1.9kb) and the H-GFP-H recombination cassette (1.5kb). These recombination cassettes were used in the primary and secondary targeting steps respectively using protocols described in <sup>7</sup>. Briefly, 1 ml of an overnight culture was diluted in 50ml Luria-Bertani (LB) medium with chloramphenicol selection (12.5 mg ml<sup>-1</sup>) in a 50 ml baffled conical flask and grown at 32°C in a shaking

incubator to an OD<sub>600</sub> of 0.6. Then, 15 ml was transferred to another baffled 50 ml conical flask and heat-shocked at 42°C for exactly 15 min by swirling in a water bath. The remaining culture was left at 32°C as the un-induced control. The two samples were then transferred to precooled 50 ml Falcon tubes and pelleted using 5000 r.p.m. at 0°C for 5 min. The supernatant was poured off and the pellet was suspended in 10 ml ice-cold ddH<sub>2</sub>O and the samples pelleted again. This step was repeated once more. After the second washing and centrifugation step, the supernatant was removed, and the pellet suspended in 1 ml ice-cold ddH<sub>2</sub>O and spun at full speed in a pre-chilled minicentrifuge, with two more 1 ml washes. The final pellet was suspended in 50 µl ice-cold ddH<sub>2</sub>O and mixed with 100 ng of recombination cassette and electroporated in a 0.1 cm cuvette (GeneFlow) at 25 mF, 1.75 kV and 200 V. After electroporation the bacteria were recovered in 1 ml LB for 1 h in a 32°C shaking incubator. For the secondary targeting step, the bacteria were recovered in 10 ml LB in a 50 ml baffled conical flask and incubated for 4.5 h in a 32°C shaking incubator. After the recovery period, the bacteria were washed three times in 1x M9 salts as follows: 1 ml culture was pelleted in an eppendorf tube at 13 200 r.p.m. for 15 s and the supernatant was removed with a pipette. The pellet was suspended in 1 ml of 1xM9 salts, and pelleted again. This washing step was repeated once more. After the second wash, the supernatant was removed and the pellet was suspended in 1 ml of 1xM9 salts before plating on minimal medium plates <sup>7</sup>.

Colonies were screened by Pulsed Field Gel Electrophoresis for clones that cut with an additional Sall site (inserted between 5' Homology arm and GFP sequence). A single positive clone was detected from ~80 screened. Sequencing confirmed the correct recombination.

### **Retrofitting BAC with a mammalian selection marker**

To generate stable cell lines it was necessary to retrofit the IκBα-EGFP BAC with an appropriate mammalian selection marker. We developed retrofitting constructs that could universally be applied to any BAC. Briefly, due to derivation from the same parent BAC vector construct, pBAC108L, alignment of the most common BAC vectors, pe3.6 (from the Roslin Park institute library) and the pBeloBAC vector (from the California Institute of Technology) showed perfect

homology in approximately 6kb of construct. Within this homologous region the chloramphenicol resistance gene was identified as a suitable target for replacement with a new selection marker as this would not disrupt any important bacterial sequences. Restriction site tagged homology arms 300-400bp in length were amplified from the BAC sequence using the primers (underlined indicates enzyme site) 5'H KpnI F  
 tgtcaaGGTACCGGCAGCCACATCCAG, 5'H EcoRI R  
 ggtgccGAATTCTCAACGTCTCATTTTCGC, 3'H BamHI F  
 aatgggGGATCCTGGACAACCTTCTTCGCC, 3'H SacII R  
 aatgggCCGCGGCCGTCGACCAATTCTC and cloned using the appropriate enzymes into the multiple cloning sites of pL451<sup>8</sup>. This resulted in a recombination cassette containing H-pGK-pEM7-Kan/Neo-H. Retrofitting was performed in the same SW102 strain hosting the BAC by heat inducing the bacteria for recombination, transforming with the cassette and plating on LB containing Kanamycin (25 ug ml<sup>-1</sup>). Clones were screened by PFGE and >90% recombination efficiency was observed.

### **BAC Stable transfection**

BAC DNA was prepared by maxiprep (BAC100 Nucleobond kit, Macherey-Nagel, Germany) and 1 ug or 3 ug were used to transfect 10<sup>6</sup> SK-N-AS cells in a 10 cm dish using 9.87 ul ExGen500 transfection reagent (following manufacturer's recommendations). Media was changed 3 days post transfection and supplemented with 500 µg ml<sup>-1</sup> G418. Media + antibiotic were refreshed every 3-4 days. Colonies formed 2-3 weeks after culturing in selection containing media were ring cloned into individual wells of a 48 well plate and sequentially scaled up to large culture vessels as necessary.

### **Analysis of IκBα and NF-κB p65 levels in BAC cell lines.**

The temporal NF-κB response was investigated in developed BAC IκBα-eGFP cell lines. In C9 cells, which were used for most of the single cell experiments, TNFα stimulation resulted in a rapid degradation and re-synthesis of IκBα protein, similar to that in WT cells (Supplementary Figure 1). At 15 min after treatment, the endogenous IκBα protein was undetectable, which was potentially

consequence of low resting levels, while a residual expression of I $\kappa$ B $\alpha$ -eGFP was present. A simultaneous recovery of the endogenous and I $\kappa$ B $\alpha$ -eGFP protein was observed, with a peak at 60 min (after continuous TNF $\alpha$  stimulation). Further accumulation of I $\kappa$ B $\alpha$  levels was observed 120 min after a single TNF $\alpha$  pulse, but not after continuous stimulation, reaching pre-stimulation steady-state (i.e., high I $\kappa$ B $\alpha$ -eGFP and low endogenous I $\kappa$ B $\alpha$  levels). This behaviour was in a good agreement with single-cell data in Fig. 2a. In both cases the fluorescently labelled protein mirrored the response of the endogenous I $\kappa$ B $\alpha$ . A delayed degradation of I $\kappa$ B $\alpha$ -eGFP was observed in C9L, comparing to that in C9 cells, Figure 2d and Supplementary Figure 1, while the endogenous I $\kappa$ B $\alpha$  in C9L showed a rapid and complete degradation at 15 min after stimulation, similar to that of WT cells. A comparative analysis of I $\kappa$ B $\alpha$  in different cell lines showed that the resting endogenous I $\kappa$ B $\alpha$  levels were elevated in C9L, comparing to C9 cells (Supplementary Figure 2). We expect that this be due to transduction of fluorescently labelled p65-mCherry, which might enhance production of or stabilise I $\kappa$ B $\alpha$  protein <sup>1,9</sup>.

We found that NF- $\kappa$ B p65 oscillation patterns in our stable cell lines were consistent (period of 106  $\pm$ 30 and 109  $\pm$ 27 min in C9 and C9L, respectively, as defined by individual peak-to-peak timing of I $\kappa$ B $\alpha$ -EGFP, **Supplementary Figure 3**). Similarly, SK-N-AS cells transiently transfected with I $\kappa$ B $\alpha$ -eGFP BAC showed a similar period of 116  $\pm$ 27 min. Also, C9 cells transfected with p65-Dsredxp plasmid a period of 110  $\pm$ 21 min, while the period in WT SK-N-AS cells transfected with the same plasmid was 110  $\pm$ 38 min. These data confirmed that our cell lines provide a good model system studying single cell NF- $\kappa$ B responses.

Often the I $\kappa$ B $\alpha$ -eGFP fluorescence intensity remains below its initial value as it oscillates (Fig. 1c). We expect that this effect could be due (at least in part) to the time taken for folding and maturation of the fluorophore <sup>10,11</sup>, despite I $\kappa$ B $\alpha$ -eGFP protein level reaching the pre-stimulated steady state (or higher) at 60 min after treatment (Supplementary Figure 1). Thus, only a proportion of stimulus-induced I $\kappa$ B $\alpha$ -eGFP molecules might be detected in the microscopy experiment and this would be lower at higher oscillation frequencies. In addition we observe

that C9L cell line is characterised by lower amplitude of I $\kappa$ B $\alpha$ -eGFP oscillations (comparing with C9 cells, Fig. 1c). We expect that this could be due elevated I $\kappa$ B $\alpha$ -eGFP levels in C9L cells, which could lead to more damped oscillation patterns. Damped oscillations at the single cell level are consistent with partial I $\kappa$ B $\alpha$  degradation observed in the population (Supplementary Figure 1).

### **I $\kappa$ B $\alpha$ and p65 oscillate out of phase.**

In response to continuous TNF $\alpha$  stimulation C9L cells exhibited out-of-phase oscillations in the I $\kappa$ B $\alpha$ -eGFP level and the p65-mCherry nuclear translocation (Fig. 1c and Supplementary Figure 4a, for representative single cell traces). Cross-correlation analysis of representative cells showed about 50 min time lag between the I $\kappa$ B $\alpha$ -EGFP and p65-mCherry signals (Supplementary Figure 4b). The overlapping peaks in the power spectra highlighted a common oscillation frequency of I $\kappa$ B $\alpha$ -eGFP and p65-mCherry in single cells (Supplementary Figure 4c, at around 0.01 min<sup>-1</sup>, which corresponds to about 100 min period). The frequencies of I $\kappa$ B $\alpha$ -eGFP and p65-mCherry oscillation were tightly correlated, while the lag time was inversely proportional to the oscillation frequency in single cells (Supplementary Figure 4d, e).



## Supplementary Note 2: Single cell responses to TNF $\alpha$ and IL-1 $\beta$ pulses

C9 cells were stimulated with two 5 min TNF $\alpha$  pulses at intervals ranging from 50 to 100 min (Fig. 2e). The average I $\kappa$ B $\alpha$ -eGFP traces corresponding to the “responding” and “non-responding” clusters at 60 min interval are shown in Supplementary Figure 6. Single cell I $\kappa$ B $\alpha$ -eGFP trajectories are depicted with heat maps (see Fig. 2c for 60 min, and Supplementary Figure 7 for 50, 70, 80 and 100 min pulse interval). Cells were then classified as “*responders*” if a gradient of the corresponding I $\kappa$ B $\alpha$ -eGFP trajectory at the time of stimulation was not positive; otherwise they were called “*non-responders*”.

Unsupervised k-means clustering was used to validate this classification (Supplementary Figure 8). Cells were first clustered into different number of groups varying from two to four. The previously inferred “*responding*” and “*non-responding*” cells (based on the I $\kappa$ B $\alpha$ -eGFP gradient) were mapped on to obtained clusters (depicted in green and blue respectively). We found that overall the gradient-based classification was recapitulated very well in the k-means clusters (with exception of the 50 min pulsing). The Silhouette coefficient could be used to find the optimal number of clusters, however in practice it would be more difficult to implement. For example, 2 optimal clusters were identified in the 60 min pulse interval data (indicated by the highest Silhouette coefficient, in comparison with the coefficients obtained for three and four clusters, respectively), while three of four clusters separated the “*responding*” and “*non-responding*” cells better. Based on this analysis, we therefore applied a method based on the I $\kappa$ B $\alpha$ -eGFP gradient in this manuscript.

In order to test whether multiple refractory states exist within NF- $\kappa$ B system C9 cells were stimulated with two pulses of IL-1 $\beta$ . 76% of cells responded to the second pulse (**Supplementary Figure 9**), suggesting existence of a similar stimulus specific refractory state to that seen with TNF $\alpha$ . All the cells stimulated with a pulse of TNF $\alpha$  responded to the pulse of IL-1 $\beta$  60 min later, suggesting that the refractory period to TNF $\alpha$  stimulation might be controlled upstream of IKK in the signal transduction (Fig. 3a-d). When a TNF $\alpha$  pulse was applied after

IL-1 $\beta$  stimulation, 54% of cells responded, **Supplementary Figure 9** (in comparison almost ~100% of cells responded to a IL-1 $\beta$  pulse 60 min after stimulation with TNF $\alpha$ , Fig. 3a). This suggested some influence of the IL-1 $\beta$  transduction pathway on TNF $\alpha$  signalling.

### **Supplementary Note 3: Analysis of TNF $\alpha$ internalization.**

Cells were stimulated with 5 min pulses of FITC and Tx-Red fluorescently labelled TNF $\alpha$  at a 60 min interval (Figs 2e-f). Confocal microscopy images of representative WT cell stimulated first with FITC- and then Tx-Red-labelled TNF $\alpha$  showed that internalization pattern was not affected (Supplementary Figure 10). As a control, the cells were stimulated first with Tx-Red and then FITC-labelled TNF $\alpha$ , showing no change in internalization kinetics (Supplementary Figure 11). We noticed in Fig 1g the levels of TNF $\alpha$ -FITC fluorescence decreased over time, while the levels of TNF $\alpha$ -TxRed increased in the corresponding experiment (Supplementary Figure 11). We tested if the decrease of FITC (but not in the Tx-Red) fluorescence was due to its sensitivity to low-PH environment <sup>12</sup>. We excited TNF $\alpha$ -FITC at 488 and 458 nm wavelength, however saw no change in the fluorescence levels over time (Supplementary Figure 12). This suggested that changes in TNF $\alpha$ -FITC and Tx-Red over time were due to their fluorescent properties <sup>11</sup>.

Treatment with endocytosis inhibitor dynasore <sup>13</sup> prevented internalisation of labelled TNF $\alpha$ , however, no change in NF- $\kappa$ B activation was observed in single cells (Supplementary Figure 13). Functionality of the dynasore was confirmed with an acid wash. This suggested that endocytosis did not affect NF- $\kappa$ B system responses.

#### **Supplementary Note 4: Correlation between single cell responses and gene expression**

Cells were stimulated with three pulses of TNF $\alpha$ , all single cells responded to the 1<sup>st</sup> and 3<sup>rd</sup> pulse (at 0 and 100 min, respectively), but were refractory to the 2<sup>nd</sup> pulse applied at 50 min. In contrast, when stimulated with IL-1 $\beta$  at 50 min most of the cells exhibited a corresponding nuclear p65-mCherry translocation (Supplementary Figure 32). The comparison between TNF $\alpha$ /IL-1 $\beta$ /TNF $\alpha$  (TIT) and TNF $\alpha$ /TNF $\alpha$ /TNF $\alpha$  (TTT) stimulated genes (as assessed by Nanostring assay, Fig. 6c), showed a panel of 26 genes that was differentially regulated by IL-1 $\beta$  at a time when cells were refractory to TNF $\alpha$  (Fig. 6e). In particular, the members of the NF- $\kappa$ B signalling system and a number of pro-inflammatory signalling molecules including cytokines and chemokines were differentially regulated (Supplementary Figure 33).

We asked if the differential response to IL-1 $\beta$  and TNF $\alpha$  pulsing (Supplementary Figure 33) could be explained by the patterns of nuclear NF- $\kappa$ B in single cells. We quantified the level of nuclear p65-mCherry in C9L cells stimulated as in Fig. 6c (for all conditions except of the single IL-1 $\beta$  pulse). In agreement with Fig. 6a-b, the differences in the temporal NF- $\kappa$ B kinetics were recapitulated by the area under the curve (AUC) (Supplementary Figure 34a). In particular, the AUC calculated for T $_T$  and TTT calculated for the 50-100 min interval was significantly lower than for TIT (mean of 9.9 and 13.4 vs. 27.7), whereas there was no difference between treatments for the 0-50 and 100-150 min interval (see Supplementary Data 1 for statistical analyses). Coefficient of determination ( $r^2$ ) calculated between the AUC and gene expression patterns showed a bimodal distribution (Supplementary Figure 34b, see also Supplementary Data 1 for specific values). High correlation ( $r^2 > 0.6$ ) suggested that patterns observed for many genes could be explained by the AUC values for respective treatments (in terms of the total variance). Those highly correlated genes were in fact up-regulated by a single TNF $\alpha$  pulse (T $_{\_}$ ), as showed by a high Pearson correlation coefficient,  $r$ , for 50-100, but not 0-50min interval, Supplementary Figure 34c). A similar correlation structure was seen for the fold ratio between TIT and TTT

treatments (as in Fig. 6f and Supplementary Figure 34d), with genes differentially regulated by the TIT showing the highest correlation with the AUC. In agreement, a marked correlation was found between the gene expression levels in cells stimulated with single TNF $\alpha$  and IL-1 $\beta$  pulse (Supplementary Figure 34e). This analysis suggested that expression of genes differentially regulated by TNF $\alpha$  and IL-1 $\beta$  pulses could be explained in part by the patterns of nuclear NF- $\kappa$ B responses in single cells.

## Supplementary Note 5: Mathematical model of NF- $\kappa$ B signalling

### 1. Model development

To theoretically investigate the encoding of pulse TNF $\alpha$  stimulation in the NF- $\kappa$ B system, the structure <sup>6</sup> and parameters of our previously developed model of the system was used <sup>1,9,14</sup>. The revised model was fitted manually and validated against the following single-cell and population level data (see Supplementary Figure 14 - Supplementary Figure 20 for fitted model outputs):

- Fraction (and NF- $\kappa$ B p65 amplitude) of cells responding to 10 ng ml<sup>-1</sup> TNF $\alpha$  pulses at different intervals in SK-N-AS cells (data from Fig. 2).
- Single-cell NF- $\kappa$ B responses to IL-1 $\beta$  and alternate TNF $\alpha$  and IL-1 $\beta$  pulses in SK-N-AS cells (data from Figs 3, 6 and **Supplementary Figure 9**).
- Single-cell NF- $\kappa$ B responses to different doses of TNF $\alpha$  stimulation in SK-N-AS cells (data from Supplementary Figure 18).
- Single cell NF- $\kappa$ B p65 dynamics after continuous and repeat pulse stimulation with 10 ng ml<sup>-1</sup> TNF $\alpha$  (and IL-1 $\beta$ ) in SK-N-AS cells (Fig. 1), also in <sup>1,15</sup>
- Population-level IKK and NF- $\kappa$ B activity in WT and A20 knock-out (KO) mice fibroblast cells, in response to continuous TNF $\alpha$  treatment <sup>2,16</sup>.
- Population-level transient IKK activity (and corresponding NF- $\kappa$ B activation kinetics) in response to a single pulse of TNF $\alpha$  of different duration <sup>3,4</sup>.

Model parameters were fitted manually based on the parameters that were specifically developed for the SK-N-AS cell line <sup>1</sup>. We noticed that in the fitted model, parameters corresponding to the rate of A20-mediated inhibition of IKK (a reaction assumed in previous models <sup>6,9,17</sup>) was negligibly small (had no effect on systems behaviour). Therefore we removed this reaction from the model's structure arriving at the final model structure as presented in Fig. 4a.

The developed model consists of 19 ordinary differential equations and 41 parameters describing formation of complexes and their degradation, transport between nucleus and cytoplasm, transcription, translation and regulation of gene

activity (see Supplementary Table 2 for description of model variables, Supplementary Table 3 for equations and Supplementary Table 4 for parameter values). The heterogenous NF- $\kappa$ B responses were recapitulated in the model by distributions of parameters related to TNF $\alpha$  (IL-1 $\beta$ ) signal transduction pathway (Fig. 4d).

The effects of stochastic TNF $\alpha$  binding and feedback gene transcription were investigated in respective stochastic formulations of the model (see Supplementary Table 5). All simulation conditions used in the study are given in Supplementary Table 6.

## **2. Model validation**

The model recapitulated single cell NF- $\kappa$ B oscillatory responses (period of  $\sim$ 100 min) to continuous TNF $\alpha$  and IL-1 $\beta$  stimulation (Supplementary Figure 14). Simulated single cell traces appeared to be quite synchronized, suggesting that distribution of the IKKK had a limited effect on generation of heterogeneous NF- $\kappa$ B oscillations in response to continuous stimulation. The responses to pulses of TNF $\alpha$  (in terms of fraction of cells and the NF- $\kappa$ B amplitude) depended on the recycling of the generic I $\kappa$ B kinase kinase (IKKK) (A20-mediated), and specifically level of the neutral IKKK at the second pulse (Supplementary Figure 15). As described previously <sup>1</sup>, the system exhibited full responses when pulsed at 200 min interval. The TNF $\alpha$  and IL-1 $\beta$  pulses were fitted by assuming that TNF $\alpha$  and IL-1 $\beta$  signals converge independently on the IKK, with the stimulus-specific IKKKs (Supplementary Figure 16). The increased cell responsiveness to IL-1 $\beta$  stimulation (75% vs. 30% for TNF $\alpha$  pulses) was fitted assuming a higher IKKK level in comparison to that of the TNF $\alpha$  transduction pathway. The alternate TNF $\alpha$  and IL-1 $\beta$  pulses at 60 min interval were fitted assuming differential A20 inhibition of the respective IKKK activation (Supplementary Figure 16). However alternative models, with other mechanisms, for example partial IKKK utilisation by both pathways, could also fit the data. Similarly, the mathematical model was able to recapitulate NF- $\kappa$ B activation dynamics in

response to the alternating TNF $\alpha$  and IL-1 $\beta$  pulses at 50 min interval (Supplementary Figure 17).

Responses to two 5 min pulses of TNF $\alpha$  at different doses were recapitulated by additional consideration of stochastic TNF $\alpha$  binding to its cognate receptor <sup>6,17</sup>. Cells were also stimulated with a TNF $\alpha$  pulse of 0.1 ng ml<sup>-1</sup> applied at 0 min, and a 10 ng ml<sup>-1</sup> pulse at of 60 min, Supplementary Figure 18a. While only a fraction of cells responded to the first pulse, all cells responded to the 2<sup>nd</sup> pulse. When a second pulse in the refractory state was 50 ng ml<sup>-1</sup> no change in the number of responding cells was observed (in comparison to 10 ng ml<sup>-1</sup> second pulse, Supplementary Figure 18b).

The model was fitted and validated against the published population level data in mouse embryonic fibroblasts (MEFs), which informed the temporal relationship between NF- $\kappa$ B and IKK activation levels (in particular in the A20 deficient cells) (Supplementary Figure 19-Supplementary Figure 20).

### **3. Sensitivity analysis of the model**

Sensitivity analyses were performed to determine which model parameters controlled different features of the NF- $\kappa$ B response. Latin hypercube sampling showed that the period of NF- $\kappa$ B nuclear oscillations in response to continuous TNF $\alpha$  stimulation was controlled by parameters related to I $\kappa$ B $\alpha$  feedback, while the amplitude of oscillations was in addition controlled by A20 feedback (Supplementary Figure 24). I $\kappa$ B $\alpha$ - and A20-related parameters were also most sensitive in the dynamic sensitivity analysis of the nuclear NF- $\kappa$ B trajectory (Supplementary Figure 25).

Dynamic sensitivity analyses <sup>18</sup> of nuclear NF- $\kappa$ B trajectories in cells that responded to two TNF $\alpha$  pulses showed sensitivity towards I $\kappa$ B $\alpha$  and A20 parameters (e.g., *c1*, *c1a*, *c3a*; Supplementary Figure 26 and 27 for the response to a single pulse). In contrast, the NF- $\kappa$ B dynamics in a non-responding cell was dominated by a slowly decaying dependence on IKKK and A20 parameters (e.g., *IKKKtott*; *c1*, Fig. 4h and Supplementary Figure 26).



Sensitivity analyses of the TNF $\alpha$  and IL-1 $\beta$  receptor modules showed that while related parameters could be relevant (e.g., total number of receptors, *Rtot* for TNF $\alpha$  pulses), the IKKK and A20 levels were more important for single cell refractoriness (Supplementary Figure 28).

#### 4. Model formulation

The IKK signalling module: The IKK module incorporates the multi-step transduction pathway downstream of TNFR and IL1R. The respective pathways are complex and not fully elucidated<sup>19,20</sup>, however our data suggested that the refractory period was controlled by molecular events above the IKK and below the receptor level (Fig. 3). The simplest biologically relevant structure that could explain this data was used, effectively reducing this complex network of interaction into a single process (Fig. 4a). In particular, the model assumed previously described interaction between the generic I $\kappa$ B kinase kinase (IKKK) and the A20 feedback protein<sup>6,9,17,21-23</sup> (Fig. 4B). An alternative mathematical description of the TNF $\alpha$  transduction pathway has also been proposed by<sup>3</sup> and included additional molecular events leading in IKKK activation. In agreement with<sup>6,9</sup>, we assumed that IKKK exists in three states: ‘neutral’ (IKKK<sub>n</sub>) that can be activated by TNF $\alpha$ , ‘active’ that regulates IKK phosphorylation, and ‘inactive’ that constitutively converts into a ‘neutral’ state. The total level of IKKK was assumed to be constant per cell, while the A20 inhibited ‘active’ IKKK, by facilitating the transition to an ‘inactive’ state and thus limiting the extent of IKK activity. We assumed that TNFR and IL1R transduction pathways utilized different upstream IKKKs (IKKK<sub>t</sub> and IKKK<sub>i</sub>, respectively), which independently converged on the IKK<sup>24</sup>. Similarly, we assumed that A20 inhibited both TNF $\alpha$ - and IL-1 $\beta$ -dependent responses. This effect has been described by a prolonged NF- $\kappa$ B activation in A20 deficient cells in response to TNF $\alpha$ <sup>2-4,16</sup>. Signalling downstream from IL-1 $\beta$  is less characterized; in particular no effect was shown by<sup>2,3</sup> in A20 deficient cells, while a prolonged NF- $\kappa$ B activation was observed by<sup>16</sup> using knockout studies. For simplicity we used a parallel A20-dependent activation mechanism for IL-1 $\beta$  and TNF $\alpha$  transduction pathway.

Distributed IKKK: The distribution of refractory periods was recapitulated in the model by heterogeneous expression of IKKK in the population of cells (Fig. 4d). Specifically, we assumed that the total IKKK level was constant in a single cell but normally distributed in the population with mean  $\mu=1 \times 10^6$  and  $\mu=1.3 \times 10^6$  for TNF $\alpha$  and IL-1 $\beta$  pathways respectively, and standard deviation  $\sigma=0.3\mu$  molecules:

$$f(x, \mu, \sigma) = \frac{1}{\sqrt{2\pi}\sigma} e^{-\frac{(x-\mu)^2}{2\sigma^2}}, x > 0.1 \cdot \mu.$$

When simulating the effect of parameters other than IKKK level (e.g. IKKK recycling rate, m3, and I $\kappa$ B $\alpha$  half life, c4a) on the refractory period, an above normal distribution was used with mean  $\mu_{c4a}$  equal to its nominal value and  $\mu_{m3}$  equal to 1.2 $\times$ nominal value. A standard deviation of  $\sigma=0.3\mu$  was used in all cases (as in Fig. 4i). However, other distributions (e.g., log-normal or uniform) could also be used to fit the data (Supplementary Figure 22).

The NF- $\kappa$ B base module: The base module described the core interaction between the NF- $\kappa$ B and the I $\kappa$ B $\alpha$  negative feedback<sup>1,15,25</sup>. Previously, we characterized the role of the I $\kappa$ B $\epsilon$  negative feedback in generation of NF- $\kappa$ B oscillation timing in response to the continuous TNF $\alpha$  stimulation<sup>9,26,27</sup>. This mechanism was omitted in the current model and as a result simulated single cell responses to continuous TNF $\alpha$  (and IL-1 $\beta$ ) were more synchronous (Supplementary Figure 14).

A20 mRNA and protein level: Previous models assumed that the parameters controlling the NF- $\kappa$ B-dependent I $\kappa$ B $\alpha$  and A20 feedback (rates of transcription, translation, mRNA and protein half-lives) were the same<sup>1,6,9</sup>. This resulted in similar simulated mRNA and protein levels (around 200 mRNA and 100,000 protein molecules) per cell. While quantitative I $\kappa$ B $\alpha$  and A20 protein levels are not yet available, population-level gene expression assays indeed suggested up to 300 I $\kappa$ B $\alpha$  and 600 A20 transcript on average in mouse fibroblast cells<sup>6</sup>. In agreement, recent smFISH measurements of A20 and I $\kappa$ B $\alpha$  transcript abundance in HeLa cells following 10 ng ml<sup>-1</sup> TNF $\alpha$  stimulation showed heterogeneous

expression patterns with average levels of 250 molecules per cell, respectively<sup>28</sup>. In contrary, our quantitative Nanostring assay suggested that in SK-N-AS cells, the average A20 transcript expression was about 40 times lower than the expression of I $\kappa$ B $\alpha$  following treatments with TNF $\alpha$  and IL-1 $\beta$  (Fig. 6e). Therefore, while not changing any I $\kappa$ B $\alpha$ -related parameters, the A20 transcription rate was decreased accordingly, resulting in approximately 6 mRNA and 3,000 protein molecules of A20 on average. Such relatively low levels might generate substantial intrinsic noise (as shown in in the stochastic formulation of the model, Fig. 5b, c). However, the analysis of equilibrated TNF $\alpha$  stimulation showed that the NF- $\kappa$ B responses were seemingly not affected by this heterogeneity, and instead were deterministic (Fig. 5d). This suggested that the intrinsic noise in A20 regulation has a limited effect on the system's response to TNF $\alpha$  pulses. We expect, that the tight control of the enzymatic activity<sup>16,19,20</sup>, rather than apparent heterogeneous expression level drive the function of A20 protein.

Low dose activation due to stochastic receptor binding: In order to recapitulate responses to low doses of TNF $\alpha$  stimulation in SK-N-AS cells (Supplementary Figure 18) stochastic binding of TNF $\alpha$  to its cognate receptor was considered with a fixed number of receptors in each simulation. Here we found that about 70% of C9 cells responded to a 5 min TNF $\alpha$  pulse at 0.1 ng ml<sup>-1</sup> dose. Previously, using transient transfection with p65-DsRedxp plasmid, we found that about 20% of SK-N-AS cells responded to the same simulation dose<sup>14</sup>. We expect that this difference is due to increased sensitivity of the I $\kappa$ B $\alpha$ -eGFP reporter cells. In the model we assumed that a single cell resides in 1 nl of media. Other volumes could be recapitulated by rescaling receptor-binding rates. The extracellular volume is substantially larger than the volume of a cell (~1 pl on average) therefore the receptor-binding rate would be limited by diffusion of limited number of TNF $\alpha$  molecules in the volume<sup>6,17</sup>.

## 5. Stochastic model description

Stochastic simulation algorithm was used to investigate the role of the intrinsic

noise in the system. A hybrid model was developed in which the biochemical reactions were split into *fast* and *slow*; *fast* reactions were approximated by rate equations, while *slow* reactions were considered stochastic <sup>29</sup>. In particular, these former included the regulation of IκBα and A20 gene activity <sup>9,30</sup> and TNFR receptor binding <sup>6</sup>. In addition, the A20 mRNA death and birth process was considered stochastic due to low number of molecules involved (<10 mRNAs).

We assumed that each gene has two independent homologous copies activated due to NF-κB binding and inactivated by the nuclear IκBα protein <sup>30</sup>. Let  $G^i(t) \in \{0,1\}$ ,  $i=1,2$  denote the binary state of a promoter of single gene copy:  $G^i(t)=1$  whenever NF-κB is bound to the promoter, and  $G^i(t)=0$  otherwise. The gene state describes the state of both homologous copies and is given by  $G_{A20}(t) = G^1_{A20}(t) + G^2_{A20}(t)$ , and  $G_{IκBα}(t) = G^1_{IκBα}(t) + G^2_{IκBα}(t)$  for *A20* and *IκBα* promoters, respectively. Let the binding propensity  $r^b$  be the rate at which the NF-κB binds to its unbound promoter, i.e., if the binding site is unbound then the probability of binding in a short time interval of duration  $dt$  is  $r^b dt$ . The dissociation propensity  $r^d$  is defined similarly. It is assumed that for NF-κB  $r^b$  is proportional to the amount of nuclear NF-κB, while the dissociation propensity  $r^d$  is proportional to the amount of nuclear IκBα protein:

$$\begin{aligned} r^b(t) &= q1_x \cdot NFκB_n(t, G), \\ r^d(t) &= q2 \cdot IκBα_n(t, G), \end{aligned}$$

where  $G$  is the state of the gene, and  $q1_x$  ( $x=\{i, a\}$  for IκBα and A20 respectively) is the binding rate of NF-κB and  $q2$  is the inducible IκBα dissociation rate. Because the A20 mRNA transcript was detected at later time points than the IκBα mRNA in SK-NA-S cells stimulated with TNFα <sup>1</sup>, we assumed different NF-κB binding rates for A20 and IκBα promoters, while dissociation rates were kept constant.

When considering an A20 mRNA birth and death process, let  $r_t^t$  and  $r_t^d$  be propensities of synthesis and degradation of one A20 mRNA molecule, respectively. Propensity of synthesis is proportional to the transcription rate and the number of active genes, while propensity of degradation is a function of number of A20 mRNA molecules ( $tA20$ ):

$$r_t^t(t) = q_{1t} \cdot G_{A20}(t),$$

$$r_t^d(t) = q_{2t} \cdot tA20(t).$$

Finally, the TNFR receptor-binding propensity,  $r_r^b$  is proportional to the number of available TNF $\alpha$  molecules. Similarly, receptor inactivation propensity (due to dissociation of TNF $\alpha$ ),  $r_r^d$  is proportional to the number of active receptors ( $R_t$ ):

$$\begin{aligned} r_r^b(t) &= r_1 \cdot TNF(t), \\ r_r^d(t) &= r_2 \cdot R_t(t). \end{aligned}$$

The total propensity function  $r(t)$  for the occurrence of any of the reactions is given by

$$\begin{aligned} r(t) &= r_{A20}^b(t) \cdot (2 - G_{A20}(t)) + r_{IkB\alpha}^b(t) \cdot (2 - G_{IkB\alpha}(t)) + r_{A20}^d(t) \cdot G_{A20}(t) \\ &\quad + r_{IkB\alpha}^d(t) \cdot G_{IkB\alpha}(t) + q_{1t} \cdot G_{A20}(t) + q_{2t} \cdot tA20(t) + r_r^b(t) \\ &\quad \cdot (R_{tot} - R_t) + r_2 \cdot R_t(t), \end{aligned}$$

where  $r_{A20}$  and  $r_{IkB\alpha}$  are individual propensities for  $A20$  and  $IkB\alpha$ , respectively.

The numerical scheme implemented follows that of <sup>30</sup>:

1. At simulation time  $t$ , for given state of the system calculate the total propensity function  $r(t)$  of occurrence any of the reactions.
2. Select 2 random numbers  $p_1$  and  $p_2$  from the uniform distribution  $[0,1]$ .
3. Evaluate the system of ODEs accounting for deterministic reactions until time  $t+\tau$ , such

$$\log(p_1) + \int_t^{t+\tau} r(s) ds = 0.$$

4. Determine which reaction occurs at time  $t+\tau$  using inequality

$$\sum_{i=1}^{k-1} r_i(t + \tau) < p_2 \cdot r(t + \tau) \leq \sum_{i=1}^k r_i(t + \tau),$$

where  $r_i(t + \tau)$ ,  $i=1, \dots$ , are individual reaction propensities and  $k$  is the index of the reaction. Time  $t+\tau$  is then replaced by  $\tau$  and the process is repeated.

## 6. Model simulations

Deterministic model: The system was initialized with the total NF- $\kappa$ B in the complex with  $IkB\alpha$  in the cytoplasm, and the total IKK and IKKK was initialized in the respective neutral form (all other state variables are set to zero). The total IKKK level was randomized from the reference distribution per cell, and the

system was simulated to reach the steady state before TNF $\alpha$  (and IL-1 $\beta$ ) activation.

**Stochastic model:** The stochastic receptor binding was considered to recapitulate low dose TNF $\alpha$  simulation. Separately, the intrinsic noise due to activation of A20 and I $\kappa$ B $\alpha$  genes we preformed to show that such model could recapitulate TNF $\alpha$  pulse data at 70 min interval (Fig. 5b). This model, however subsequently failed to agree with the equilibrated TNF $\alpha$  pulse data (Fig. 5c-e), suggesting that extrinsic noise was more important. In the intrinsic noise simulations, cells were simulated for time  $t$  uniformly distributed on the interval from 2 to 5 hours prior to TNF $\alpha$  stimulation. Due to the natural degradation of I $\kappa$ B $\alpha$  and the resulting basal NF- $\kappa$ B translocations sensitivity to any initial conditions is lost<sup>30</sup>.

In the stochastic receptor activation model, reactions in equation 14 (Supplementary Table 3) were replaced by propensities for receptor binding and dissociation, and simulated using the numerical scheme described above. In this description, active receptor number ( $Rt$ ) became a discrete random variable.

In the stochastic transcription model, reactions in Equation 10 (Supplementary Table 3) were replaced by propensities for A20 gene activation and mRNA transcription. Additionally, Equation 7 refers to discrete state of I $\kappa$ B $\alpha$  gene ( $GI\kappa B\alpha$ ), while equation 11 refers to discrete number of A20 mRNA transcript ( $tA20$ ):

$$7. \text{ddt}(tI\kappa B\alpha) = c1a*GI\kappa B\alpha - c3a*tI\kappa B\alpha$$

$$11. \text{ddt}(A20) = c2*tA20 - c4*A20$$

The resulting system was simulated using the numerical scheme described above (with all other equation as in Supplementary Table 3).

## 7. Dynamic sensitivity analysis

Dynamic sensitivity analysis was performed using a method outlined in<sup>18</sup>. Absolute sensitivity equations were calculated by taking the partial derivative of variables  $X_i, i=1, \dots, n$  with respect to the parameter of interest,  $\theta_j$

$$\frac{d}{dt} \frac{\partial X}{\partial \theta_j} = \frac{\partial f}{\partial X} \frac{\partial X}{\partial \theta_j} + \frac{\partial f}{\partial \theta_j} = J \cdot S_j + F_j,$$

where  $\dot{X} = f(X, \theta, t), X(t_0) = X_0$  describe the set of ODEs, and

$$J = \frac{\partial f}{\partial X} = \begin{bmatrix} \frac{\partial f_1}{\partial x_1} & \dots & \frac{\partial f_1}{\partial x_n} \\ \vdots & \ddots & \vdots \\ \frac{\partial f_n}{\partial x_1} & \dots & \frac{\partial f_n}{\partial x_n} \end{bmatrix}, \quad F_j = \frac{\partial f}{\partial \theta_j} = \begin{bmatrix} \frac{\partial f_1}{\partial \theta_j} \\ \vdots \\ \frac{\partial f_n}{\partial \theta_j} \end{bmatrix} \text{ and } S_j = \frac{\partial X}{\partial \theta_j} = \begin{bmatrix} S_{1j} \\ \vdots \\ S_{nj} \end{bmatrix}.$$

The  $S_j$  is the column sensitivity vector with respect to  $j$ th parameter. Both, model variables  $X(t)$  and sensitivity scores  $S_j$  can be solved simultaneously over time,

$$\dot{X} = f(X, \theta, t), X(t_0) = X_0$$

$$\dot{S}_j = J \cdot S_j + F_j, S_j(t_0) = S_0.$$

Relative sensitivity (RS) scores

$$\bar{s}_{ij} = \frac{\partial x_i / x_i}{\partial \theta_j / \theta_j} = S_j \frac{\theta_j}{x_i}$$

were calculated to allow direct comparisons of temporal model outputs ( $X_i$ ) with respect to parameter  $j$  (for each model parameter). For the total sensitivity analysis of a single variable, RS performance (RSP) along the time scale was calculated

$$RSP_{ij} = \frac{1}{N} \sqrt{\sum_{k=1}^N |\bar{s}_{ij}(k)|^2}$$

where  $k$  is the time instance and  $N$  is the number of points in the output.

## Supplementary References

- 1 Ashall, L. *et al.* Pulsatile stimulation determines timing and specificity of NF-kappaB-dependent transcription. *Science* **324**, 242-246, (2009).
- 2 Lee, E. G. *et al.* Failure to regulate TNF-induced NF-kappa B and cell death responses in A20-deficient mice. *Science* **289**, 2350-2354, (2000).
- 3 Werner, S. L. *et al.* Encoding NF-kappaB temporal control in response to TNF: distinct roles for the negative regulators IkappaBalpha and A20. *Genes & development* **22**, 2093-2101, (2008).
- 4 Werner, S. L., Barken, D. & Hoffmann, A. Stimulus specificity of gene expression programs determined by temporal control of IKK activity. *Science* **309**, 1857-1861, (2005).
- 5 Carlotti, F., Dower, S. K. & Qwarnstrom, E. E. Dynamic shuttling of nuclear factor kappa B between the nucleus and cytoplasm as a consequence of inhibitor dissociation. *The Journal of biological chemistry* **275**, 41028-41034, (2000).
- 6 Tay, S. *et al.* Single-cell NF-kappaB dynamics reveal digital activation and analogue information processing. *Nature* **466**, 267-271, (2010).
- 7 Warming, S., Costantino, N., Court, D. L., Jenkins, N. A. & Copeland, N. G. Simple and highly efficient BAC recombineering using galK selection. *Nucleic acids research* **33**, e36, (2005).
- 8 Liu, P., Jenkins, N. A. & Copeland, N. G. A highly efficient recombineering-based method for generating conditional knockout mutations. *Genome research* **13**, 476-484, (2003).
- 9 Paszek, P. *et al.* Population robustness arising from cellular heterogeneity. *Proc Natl Acad Sci U S A* **107**, 11644-11649, (2010).
- 10 Shaner, N. C., Steinbach, P. A. & Tsien, R. Y. A guide to choosing fluorescent proteins. *Nature methods* **2**, 905-909, (2005).
- 11 Day, R. N. & Davidson, M. W. The fluorescent protein palette: tools for cellular imaging. *Chem Soc Rev* **38**, 2887-2921, (2009).
- 12 Maxfield, F. R. & McGraw, T. E. Endocytic recycling. *Nat Rev Mol Cell Biol* **5**, 121-132, (2004).
- 13 Kirchhausen, T., Macia, E. & Pelish, H. E. Use of dynasore, the small molecule inhibitor of dynamin, in the regulation of endocytosis. *Method Enzymol* **438**, 77-93, (2008).
- 14 Turner, D. A. *et al.* Physiological levels of TNFalpha stimulation induce stochastic dynamics of NF-kappaB responses in single living cells. *J Cell Sci* **123**, 2834-2843, (2010).
- 15 Nelson, D. E. *et al.* Oscillations in NF-kappa B signaling control the dynamics of gene expression. *Science* **306**, 704-708, (2004).
- 16 Shembade, N., Ma, A. & Harhaj, E. W. Inhibition of NF-kappaB signaling by A20 through disruption of ubiquitin enzyme complexes. *Science* **327**, 1135-1139, (2010).
- 17 Lipniacki, T., Puszynski, K., Paszek, P., Brasier, A. R. & Kimmel, M. Single TNFalpha trimers mediating NF-kappaB activation: stochastic robustness of NF-kappaB signaling. *BMC bioinformatics* **8**, 376, (2007).
- 18 Yue, H. *et al.* Insights into the behaviour of systems biology models from dynamic sensitivity and identifiability analysis: a case study of an NF-kappaB signalling pathway. *Molecular bioSystems* **2**, 640-649, (2006).



- 19 Hayden, M. S. & Ghosh, S. NF-kappaB, the first quarter-century: remarkable progress and outstanding questions. *Genes & development* **26**, 203-234, (2012).
- 20 Shembade, N., Pujari, R., Harhaj, N. S., Abbott, D. W. & Harhaj, E. W. The kinase IKKalpha inhibits activation of the transcription factor NF-kappaB by phosphorylating the regulatory molecule TAX1BP1. *Nature immunology* **12**, 834-843, (2011).
- 21 Pekalski, J. *et al.* Spontaneous NF-kappa B Activation by Autocrine TNF alpha Signaling: A Computational Analysis. *PLoS one* **8**, (2013).
- 22 Kellogg, R. A. & Tay, S. Noise Facilitates Transcriptional Control under Dynamic Inputs. *Cell* **160**, 381-392, (2015).
- 23 Hughey, J. J., Gutschow, M. V., Bajar, B. T. & Covert, M. W. Single-cell variation leads to population invariance in NF-kappaB signaling dynamics. *Molecular biology of the cell* **26**, 583-590, (2015).
- 24 Oda, K. & Kitano, H. A comprehensive map of the toll-like receptor signaling network. *Mol Syst Biol* **2**, 2006 0015, (2006).
- 25 Hoffmann, A., Levchenko, A., Scott, M. L. & Baltimore, D. The IkappaB-NF-kappaB signaling module: temporal control and selective gene activation. *Science* **298**, 1241-1245, (2002).
- 26 Kearns, J. D., Basak, S., Werner, S. L., Huang, C. S. & Hoffmann, A. IkappaBepsilon provides negative feedback to control NF-kappaB oscillations, signaling dynamics, and inflammatory gene expression. *J Cell Biol* **173**, 659-664, (2006).
- 27 Longo, D. M. *et al.* Dual delayed feedback provides sensitivity and robustness to the NF-kappaB signaling module. *PLoS computational biology* **9**, e1003112, (2013).
- 28 Lee, R. E., Walker, S. R., Savery, K., Frank, D. A. & Gaudet, S. Fold change of nuclear NF-kappaB determines TNF-induced transcription in single cells. *Mol Cell* **53**, 867-879, (2014).
- 29 Haseltine, E. L. & Rawlings, J. B. Approximate simulation of coupled fast and slow reactions for stochastic chemical kinetics. *Journal of Chemical Physics* **117**, 6959-6969, (2002).
- 30 Lipniacki, T., Paszek, P., Brasier, A. R., Luxon, B. A. & Kimmel, M. Stochastic regulation in early immune response. *Biophysical journal* **90**, 725-742, (2006).
